# Supplementary material for: The Influence of Acitretin on Brain Lipidomics in Adolescent Mice—Implications for Pediatric and Adolescent Dermatological Therapy
Source: MDPI journal article supplement (doi:10.3390/ijms232415535), 2022-12-08
Supplement: s1 [file s1]

a) liver (all parameters; FDR-corrected)

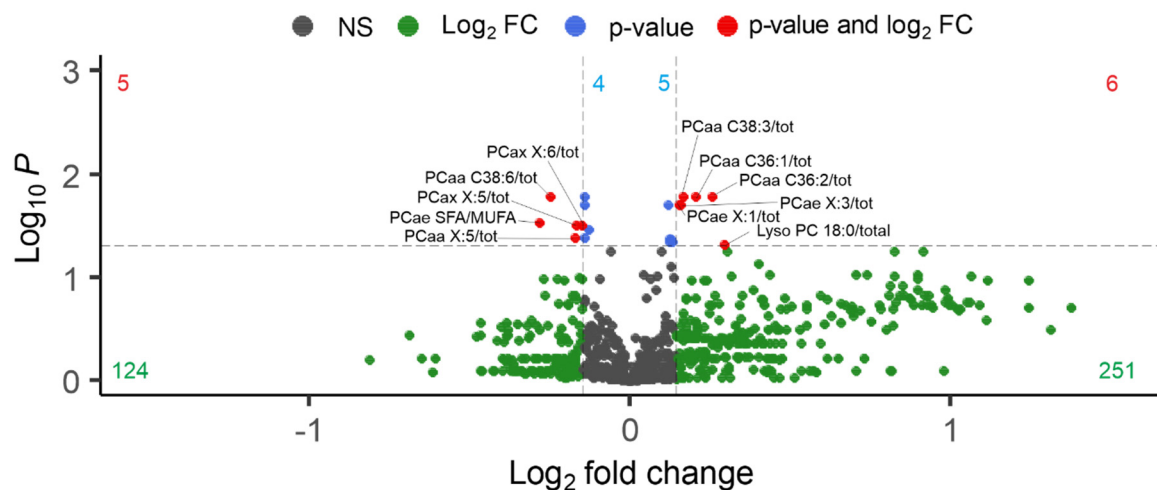

b) brain (all parameters; FDR-corrected)

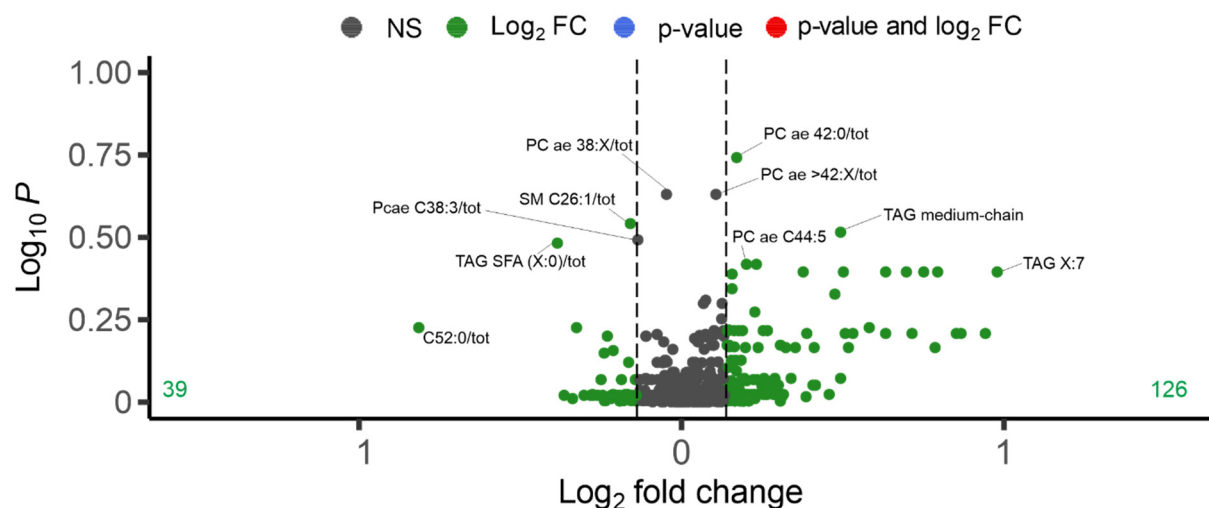

Suppl. Figure S1: Lipid changes in acitretin-treated wild type mice compared to controls after false discovery rate (FDR) correction. Mice were treated starting from the age of 9 weeks with seven daily acitretin i.p. injections. One liver lobe or one hemisphere of the brain were harvested for lipid extraction and analysis. Fold changes of the 703 included parameters are plotted logarithmically against the p value ( $-\text{Log}_{10}$ ) for liver (a) and brain (b) of female C57Bl6/J OlaHsd mice ( $n=6$  per group). A detailed description of the structure of the volcano plots can be found in the legend of Figure 1.



|                         | liver              | brain              |                                           | liver              | brain            |
|-------------------------|--------------------|--------------------|-------------------------------------------|--------------------|------------------|
| PC ae C30:0             | 188.4 ± 15.3 % (*) | 100.0 ± 9.6 %      | PC ae X:2                                 | 114.4 ± 3.4 % (*)  | 103.6 ± 2.3 %    |
| PC ae C30:1             | 200.7 ± 19.7 % (*) | 106.2 ± 11.7 %     | PC ae X:3                                 | 118.2 ± 5.2 % (*)  | 102.2 ± 2.9 %    |
| PC ae C30:2             | 199.9 ± 19.6 % (*) | 102.5 ± 17.3 %     | PC ae short-chain < C32:X                 | 198 ± 18.7 % (*)   | 102.4 ± 11.8 %   |
| PC ae C32:1             | 184.8 ± 15.9 % (*) | 104.8 ± 2.2 %      | PC ae C32:X                               | 186.8 ± 17 % (*)   | 103.7 ± 2.4 %    |
| PC ae C34:3             | 190.2 ± 17.1 % (*) | 99.3 ± 10.1 %      | PC ae 42:X                                | 130.6 ± 8.4 % (*)  | 109.1 ± 2.6 %    |
| PC ae C40:2             | 119.4 ± 4.8 % (*)  | 100.5 ± 4.7 %      | PC ae SFA / PC ae total                   | 90.8 ± 2.8 % (**)  | 99.4 ± 0.8 %     |
| PC ae C40:3             | 118.9 ± 4.6 % (*)  | 98.8 ± 5.2 %       | PC ae MUFA / PC ae total                  | 111.5 ± 2.7 % (**) | 101 ± 0.6 %      |
| PC ae C42:1             | 159.4 ± 14.9 % (*) | 113.1 ± 2.9 %      | PC ae X:2/tot                             | 108.7 ± 1.9 % (**) | 99.6 ± 0.9 %     |
| PC ae C42:2             | 134 ± 7.6 % (*)    | 105.3 ± 2.9 %      | PC ae X:3/tot                             | 111.8 ± 2.9 % (**) | 99 ± 2.4 %       |
| Lyso PC C17:0           | 172 ± 13.4 % (*)   | 101.7 ± 6.4 %      | PC ae 30:X/tot (PC ae short (<32:X)/tot ) | 188.8 ± 17.2 % (*) | 101.8 ± 12.7 %   |
| Lyso PC C26:0           | 176.8 ± 15.6 % (*) | 111.5 ± 9.1 %      | PC ae medium (32-36:X)/tot                | 107.2 ± 2.5 % (*)  | 99.7 ± 0.8 %     |
| Lyso PC C28:0           | 203 ± 16.3 % (*)   | 109.0 ± 9.9 %      | PC ae long (>36:X)/tot                    | 96 ± 1.5 % (*)     | 100.2 ± 0.6 %    |
| Lyso PC C28:1           | 204.8 ± 19.5 % (*) | 132.6 ± 15.4 %     | PC ae 32:X/tot                            | 177.6 ± 15.3 % (*) | 99.8 ± 1.4 %     |
| SM C16:1 OH             | 154.8 ± 11.2 % (*) | 97.8 ± 10.9 %      | PC ae 38:X/tot                            | 91.7 ± 1.7 % (**)  | 96.8 ± 1.2 % (*) |
| C03 OH                  | 132.4 ± 4.4 % (*)  | 100.9 ± 9.3 %      | PC ae 42:X/tot                            | 123.6 ± 6.1 % (*)  | 105.3 ± 1.8 %    |
| C10                     | 113.3 ± 4.4 % (*)  | 103.8 ± 4 %        | PC ae SFA/MUFA /aa                        | 76.9 ± 9.8 % (*)   | 103 ± 2.6 %      |
| PC aa C24:0/tot         | 207.7 ± 20.3 % (*) | 90.6 ± 18.6 %      | PC ae C30:X / PC aa C30:X                 | 174.2 ± 16.9 % (*) | 96.1 ± 22.9 %    |
| PC aa C28:0/tot         | 237.2 ± 18.3 % (*) | 100.5 ± 14.2 %     | PC ae C32:X / PC aa C32:X                 | 248.9 ± 19.3 % (*) | 102 ± 13.7 %     |
| PC aa C28:1/tot         | 208.6 ± 20.4 % (*) | 95.6 ± 15.7 %      | PC axX:4/X:6                              | 109.1 ± 2 % (**)   | 97.3 ± 1.4 %     |
| PC aa C34:3/tot         | 90.8 ± 3.1 % (*)   | 92.0 ± 3.2 %       | PC axX:4/(X5+X6)                          | 109.5 ± 1.8 % (**) | 97.5 ± 1.4 %     |
| PC aa C36:1/tot         | 115.4 ± 3.1 % (**) | 100.6 ± 2.1 %      | PC ax X:2/tot                             | 105.9 ± 1.1 % (*)  | 99.2 ± 1.6 %     |
| PC aa C36:2/tot         | 119.6 ± 2.8 % (**) | 98.4 ± 1.9 %       | PC ax X:5/tot                             | 89.1 ± 2.1 % (**)  | 100.4 ± 1.6 %    |
| PC aa C36:4/tot         | 90.7 ± 1.3 % (***) | 96.3 ± 3.4 %       | PC ax X:6/tot                             | 90.2 ± 2.5 % (**)  | 101.2 ± 2 %      |
| PC aa C38:3/tot         | 112.5 ± 1.7 % (*)  | 98.7 ± 1.8 %       | PC ax short (<32:X)/tot                   | 186.5 ± 17.5 % (*) | 99.3 ± 10.1 %    |
| PC aa C38:5/tot         | 86.9 ± 2.7 % (*)   | 96.1 ± 1.6 %       | PC ax 30:X/tot                            | 163.2 ± 14.8 % (*) | 97.3 ± 9.5 %     |
| PC aa C38:6 /tot        | 84.3 ± 3 % (**)    | 98.9 ± 0.9 %       | PC ax 36:X/tot                            | 103.2 ± 1.1 % (*)  | 99.1 ± 1.3 %     |
| PC aa C40:5 /tot        | 90.7 ± 2.1 % (*)   | 105.4 ± 1.5 %      | PC ax 42:X/tot                            | 135.4 ± 10.2 % (*) | 104 ± 7.1 %      |
| PC aaX:4/X:6            | 109 ± 2 % (**)     | 97.4 ± 2 %         | PC ax >42:X/tot                           | 167.3 ± 15.1 % (*) | 105.4 ± 6.2 %    |
| PC aaX:4/(X5+X6)        | 109.7 ± 1.9 % (**) | 98.4 ± 2 %         | PC ae/aa C30:0                            | 192.9 ± 16.1 % (*) | 94.9 ± 21.1 %    |
| PC aa X:2/tot           | 106.3 ± 1.2 % (*)  | 99.3 ± 1.4 %       | PC ae/aa C32:1                            | 237.1 ± 18.5 % (*) | 106.7 ± 12.8 %   |
| PC aa X:5/tot           | 88.8 ± 2.3 % (**)  | 98.3 ± 1.1 %       | PC ae/aa C32:2                            | 216.2 ± 20.1 % (*) | 92.1 ± 19.2 %    |
| PC aa X:6/tot           | 90.8 ± 2.4 % (*)   | 102 ± 1.2 %        | PC ae/aa C34:3                            | 259.7 ± 20.6 % (*) | 103.6 ± 19.9 %   |
| PC aa short (<32:X)/tot | 183.3 ± 17.5 % (*) | 98.2 ± 8.7 %       | Lyso PC C26:X                             | 164.5 ± 15.6 % (*) | 111.9 ± 10.5 %   |
| PC aa <30:X/tot         | 199.2 ± 18.7 % (*) | 98.9 ± 16.1 %      | Lyso PC C28:X                             | 204 ± 17.7 % (*)   | 120.3 ± 12.4 %   |
| PC aa 36:X/tot          | 103.8 ± 1.1 % (*)  | 99.3 ± 1.7 %       | Lyso PC 20:4/total (lyso PC X:4/total )   | 90.1 ± 2.5 % (*)   | 92.5 ± 6.4 %     |
| PC ae C30:0/tot         | 180.9 ± 14.3 % (*) | 98.1 ± 10.5 %      | Lyso PC 20:5/total (lyso PC X:5/total )   | 124.5 ± 3.7 % (*)  | 102.3 ± 7.5 %    |
| PC ae C30:1/tot         | 191.3 ± 18.1 % (*) | 106.1 ± 12.5 %     | Lyso PC 22:6/total (lyso PC X:6/total )   | 85.7 ± 4.3 % (*)   | 96.4 ± 6 %       |
| PC ae C30:2/tot         | 189.6 ± 18.1 % (*) | 104 ± 18.2 %       | Lyso PC 17:0/total (lyso PC 17:X/total )  | 177.6 ± 12.4 % (*) | 91.8 ± 7.8 %     |
| PC ae C32:1/tot         | 175.4 ± 14.2 % (*) | 100.8 ± 1.2 %      | Lyso PC 24:0/total (lyso 24:X/total )     | 175.8 ± 16.9 % (*) | 111.9 ± 15.2 %   |
| PC ae C32:2/tot         | 183.5 ± 18.4 % (*) | 90 ± 7.4 %         | Lyso 26:X/total                           | 171.8 ± 16 % (*)   | 101 ± 14.5 %     |
| PC ae C34:3/tot         | 179.3 ± 15.1 % (*) | 99.5 ± 10.9 %      | Lyso 28:X/total                           | 213.4 ± 18.2 % (*) | 106.3 ± 14.8 %   |
| PC ae C38:0/tot         | 83.2 ± 3.3 % (**)  | 92.6 ± 2.2 %       | Lyso PC 18:0/total                        | 122.7 ± 3.5 % (**) | 100.2 ± 2.1 %    |
| PC ae C40:0/tot         | 88.9 ± 4.1 % (*)   | 98.7 ± 1.4 %       | Lyso PC 26:0/total                        | 186.3 ± 15.8 % (*) | 101.2 ± 12.5 %   |
| PC ae C42:0 /tot        | 120.2 ± 5.5 % (*)  | 112.6 ± 2.6 % (**) | Lyso PC 28:0/total                        | 209.6 ± 16.5 % (*) | 96.4 ± 11.7 %    |
| PC ae C42:1 /tot        | 151.2 ± 12.4 % (*) | 109.5 ± 3 %        | Lyso PC 28:1/total                        | 216.6 ± 20.2 % (*) | 117.1 ± 18.1 %   |
| PC ae C42:2 /tot        | 127.6 ± 6.1 % (*)  | 102.1 ± 4.1 %      | SM C16:1 OH/tot                           | 162.4 ± 12.7 % (*) | 91.5 ± 5.7 %     |
| PC ae MUFA              | 117.6 ± 5.1 % (*)  | 105.3 ± 2.8 %      | SM C24:0/tot                              | 93.4 ± 1.5 % (*)   | 99.2 ± 3.1 %     |
| PC ae SFA/MUFA          | 82.2 ± 5.1 % (**)  | 98.4 ± 1.2 %       | SM MUFA/tot                               | 104.8 ± 1.5 % (*)  | 99.5 ± 2.6 %     |
| PC ae SFA/PUFA          | 89.7 ± 3.6 % (*)   | 99.7 ± 1.5 %       | C3:X                                      | 121.7 ± 4.2 % (*)  | 115.6 ± 10.4 %   |
| PC ae MUFA /PUFA        | 109.9 ± 2.9 % (*)  | 101.2 ± 1 %        | C0/(C2+C3)                                | 82.9 ± 5.5 % (*)   | 103 ± 6 %        |

Suppl. Figure S3: Significant changes of single lipid species in liver tissue upon acitretin-treatment. Elevated species are indicated in green, decreased species are labelled in red. Significance: \*,  $p < 0.05$ ; \*\*,  $p < 0.001$  as determined by Student's t-test. For a direct comparison, corresponding values obtained for brain tissue are given.

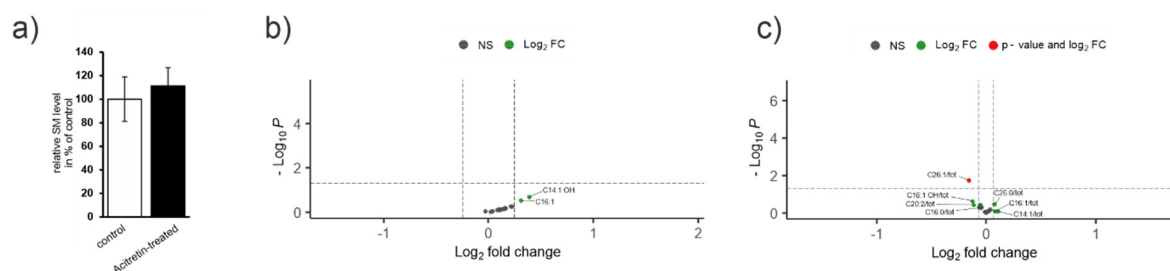

Suppl. Figure S4: SM in brain tissue of adolescent wild type mice after acitretin-treatment. a) Total amount of SM species in control and acitretin-treated hepatic tissue. Fold change and p-values for individual SM species is depicted in b). Changes in lipid species that were significant after normalization are shown in c). Statistical significance of the mean effects in liver tissue of acitretin-treated mice compared to control mice was calculated using two-sample t-test (n=6 animals per group).

|                               | brain              | liver             |
|-------------------------------|--------------------|-------------------|
| PC ae C42:0                   | 117.5 ± 4.6 % (*)  | 127.0 ± 7.5 %     |
| PC ae C44:5                   | 115.0 ± 3.8 % (*)  | 121.3 ± 9.0 %     |
| PC ae C38:3/tot               | 91.0 ± 2.4 % (*)   | 101.9 ± 1.9 %     |
| PC ae C42:0/tot               | 112.6 ± 2.6 % (**) | 120.2 ± 5.5 % (*) |
| PC ae C44:5 / PC aa 44:12/tot | 110.7 ± 3.7 % (*)  | 114.1 ± 6.4 %     |
| PC ae > 42:X                  | 111.5 ± 2.3 % (*)  | 139.9 ± 12.1 %    |
| PC ae 38:X/tot                | 96.8 ± 1.2 % (*)   | 91.7 ± 1.7 % (**) |
| PC ae >42:X/tot               | 107.7 ± 2.4 % (*)  | 132.2 ± 9.9 %     |
| PC ax >42:X                   | 111.5 ± 2.3 % (*)  | 139.1 ± 12.7 %    |
| PC ax C42:0                   | 117.1 ± 4.5 % (*)  | 118.7 ± 8.0 %     |
| SM C26:1/tot                  | 89.6 ± 3.2 % (*)   | 108.8 ± 6.0 %     |
| TAG SFA (X:0)/tot             | 76.6 ± 7.0 % (*)   | 71.9 ± 7.5 %      |

Suppl. Figure S5: Significant changes of single lipid species in brain tissue upon acitretin-treatment. Elevated species are indicated in green, decreased species are labelled in red. Significance: \*, p<0.05; \*\*, p<0.001 as determined by Student's t-test. For a direct comparison, corresponding values obtained for liver tissue are given.

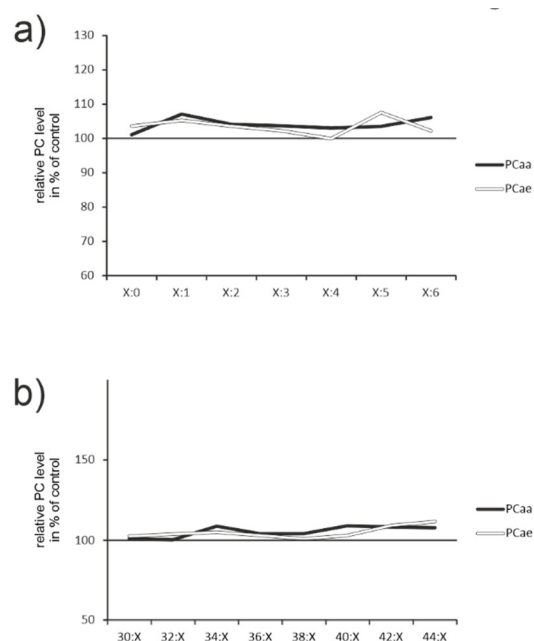

Suppl. Figure S6: Saturation and chain length of phosphatidylcholines in brain tissue from acitretin-treated mice. Processing of the data regarding saturation (a) and chain length (b) included the following species: PCaa saturation: C20-48:0, C28-42:1, C30-42:2, C32-40:3, C34-42:4, C36-42:5, C36-42:6; PCaa chain length: C30:0-2; C32:0-3; C34:1-4; C36:0-6; C38:0-6; C40:0-6, C42:0-6; C44:0; PCae saturation: C30-42:0; C30-42:1, C30-42:2; C34-44:3; C36-44:4; C36-44:5; C38-44:6; PCae chain length: C30:0-2; C32:1-2; C34:0-3; C36:0-5; C38:0-6; C40:0-6; C42:0-5; C44:3-6.

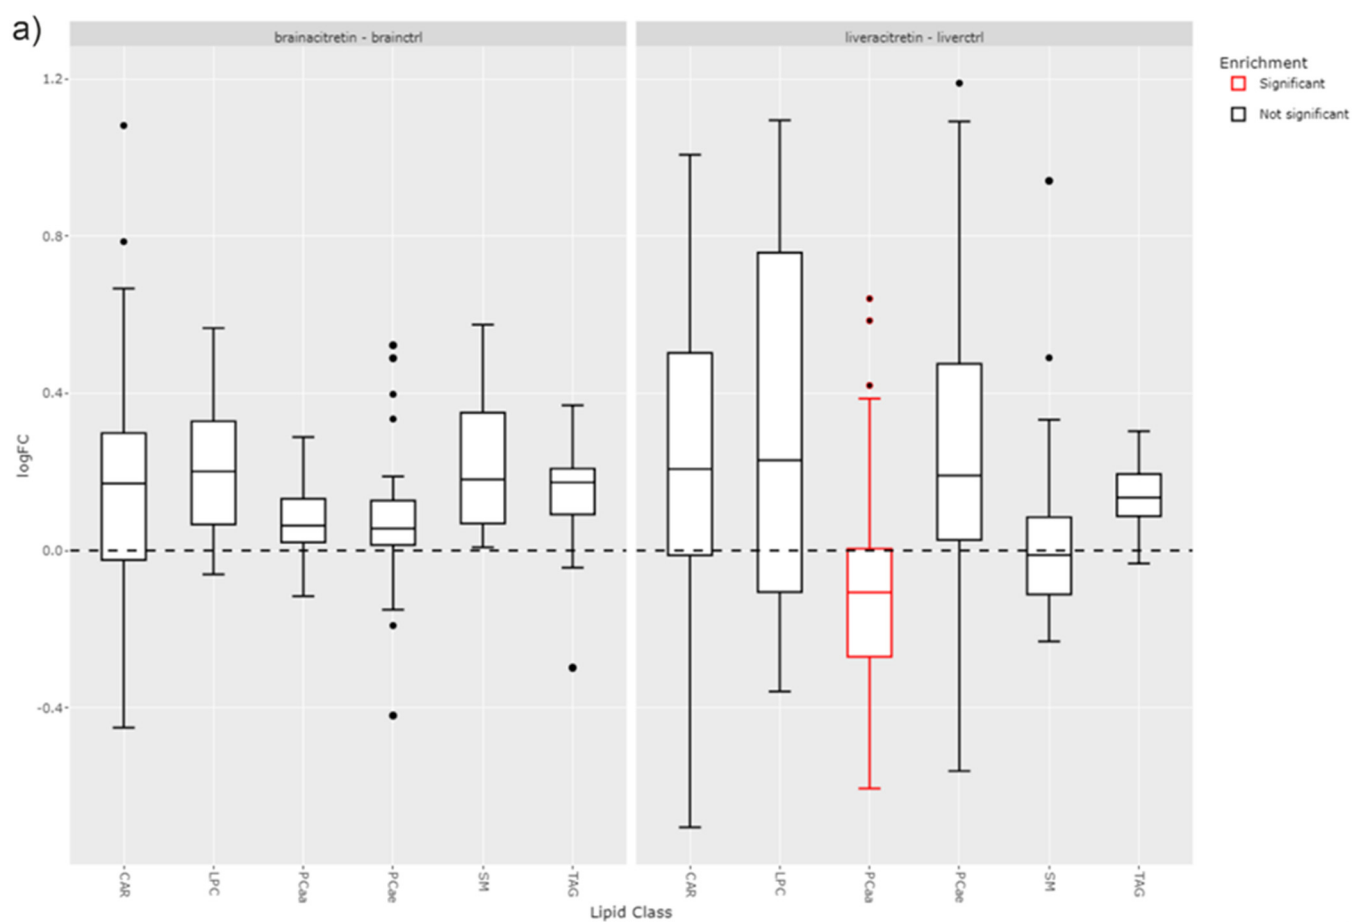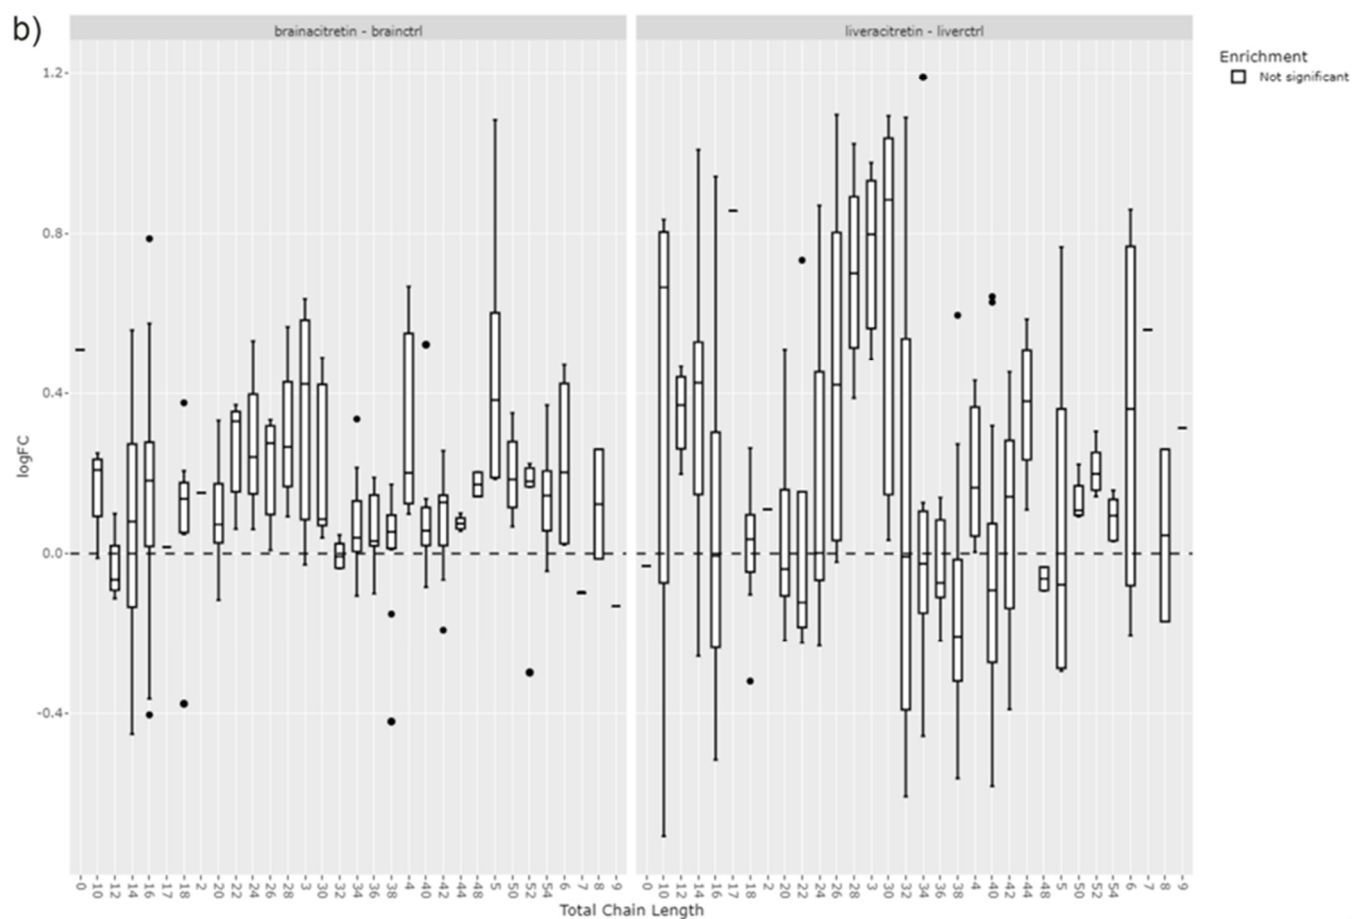

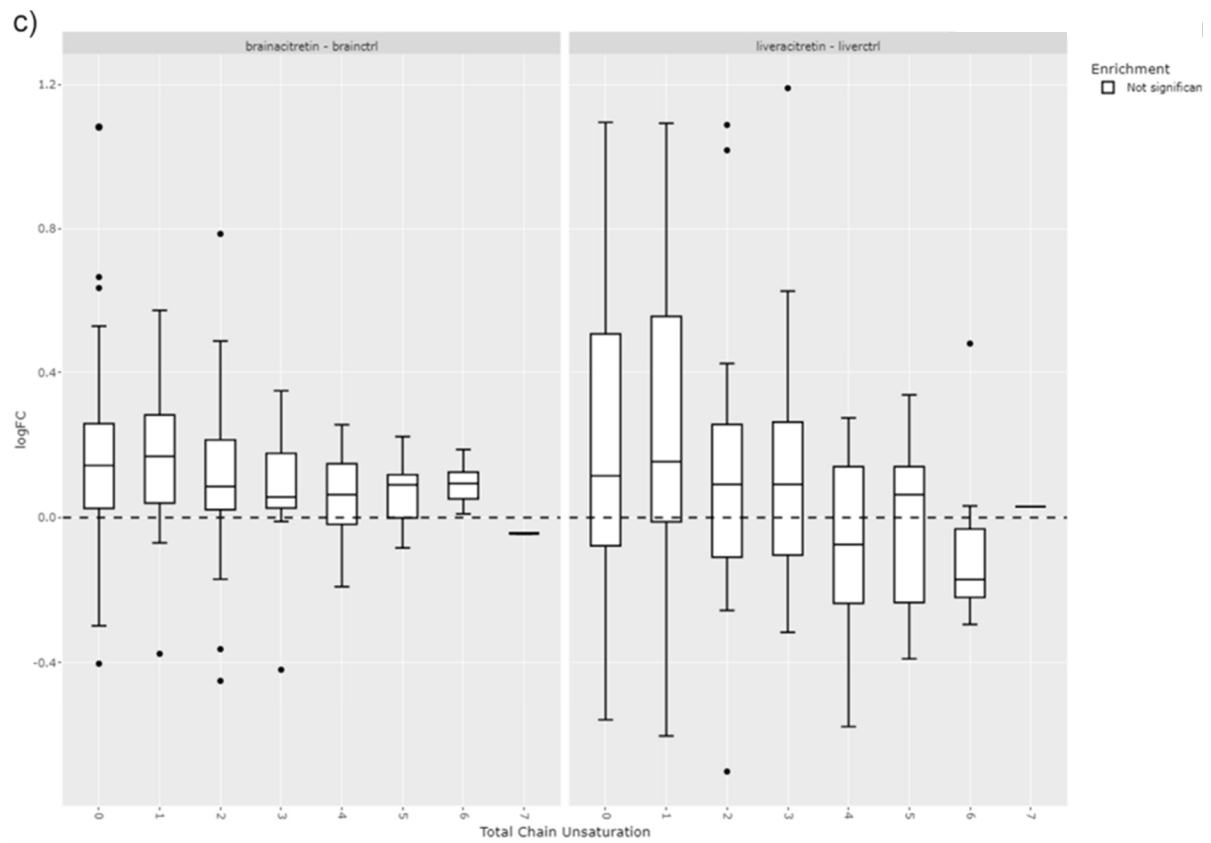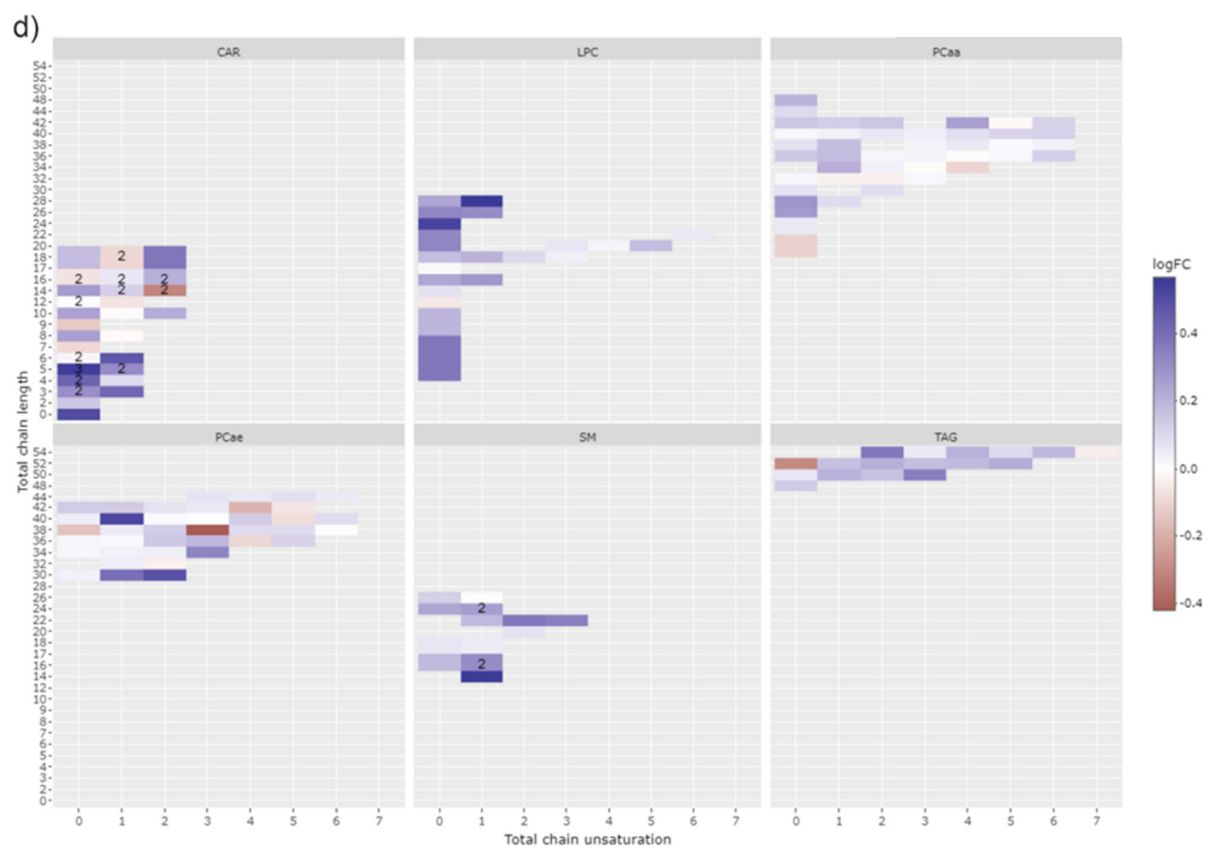

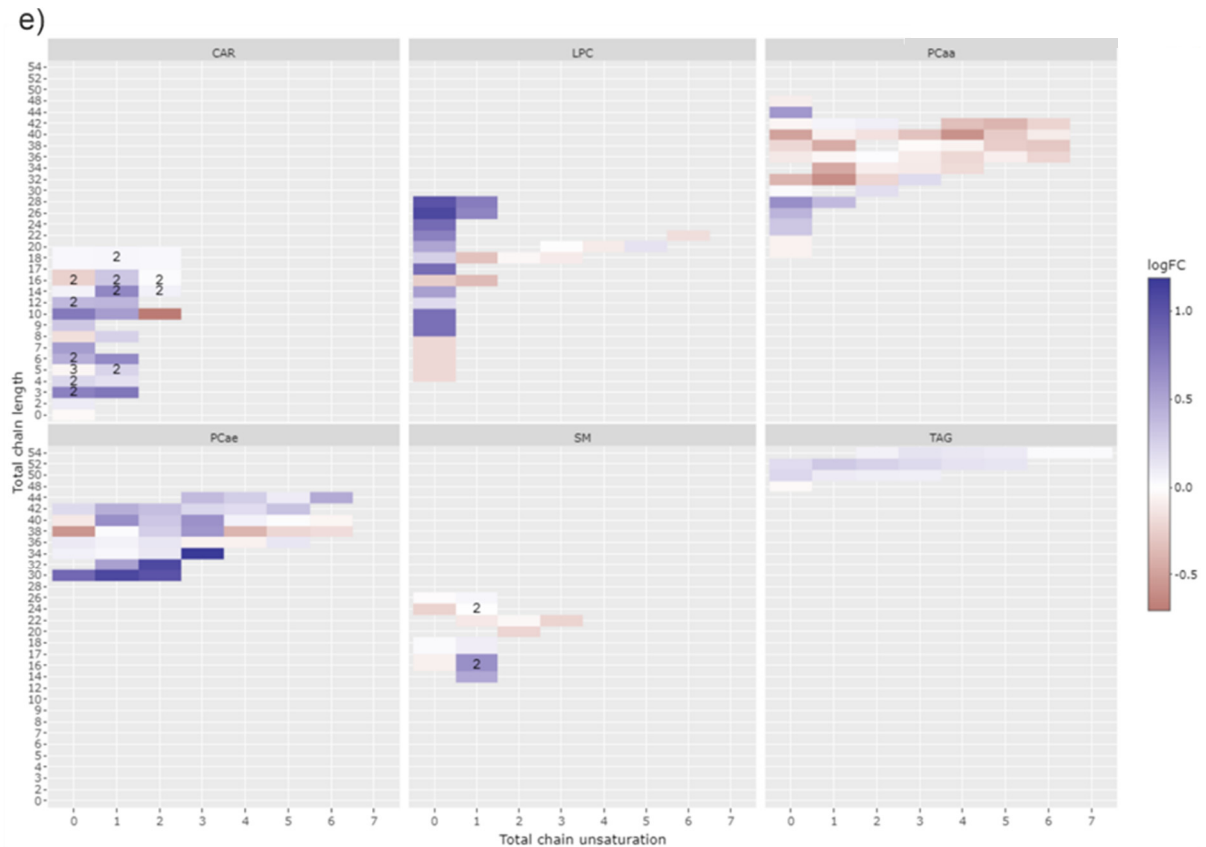

Suppl. Figure S7: Enrichment analysis using the lsea function from the R package “lipidr”. (Mohamed A, Molendijk J (2020). *\_lipidr: Data Mining and Analysis of Lipidomics Datasets\_*. R package version 2.10.0, <<https://github.com/ahmohamed/lipidr>>.) (a) Visualization of enrichment analysis (EA) result categorized by lipid class. Left side showing effect of acitretin on brain against control, right side indicating liver tissue. Boxplot in red indicating significant difference between acitretin and control. (X-axis sorted by lipid class, Y-axis logFC of acitretin against corresponding control). (b) EA sorted by chain length. (c) EA sorted by saturation. (d) Fold change of lipids per class showing total chain length and unsaturation of the acitretin-effect on brain tissue against control. Numbers on the plot indicate multiple lipids measured with the same chain properties. (e) Fold change of lipids per class showing total chain length and unsaturation of the acitretin-effect on liver tissue against control. Numbers on the plot indicate multiple lipids measured with the same chain properties.



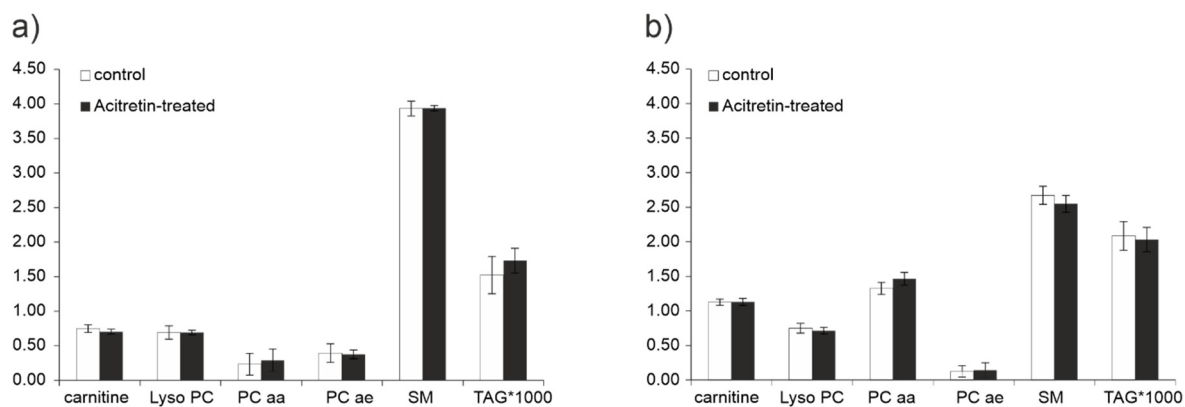

Suppl. Figure S8: Calculated matrix effects of the measured parameters carnitine, Lyso-Phosphatidylcholine (Lyso PC), Phosphatidylcholine (PCaa), Phosphatidylcholine-Plasmalogens (PCae), Sphingomyelins (SM) and Triacylglycerides (TAG) in control and acitretin-treated mice in a) liver and b) brain tissue.

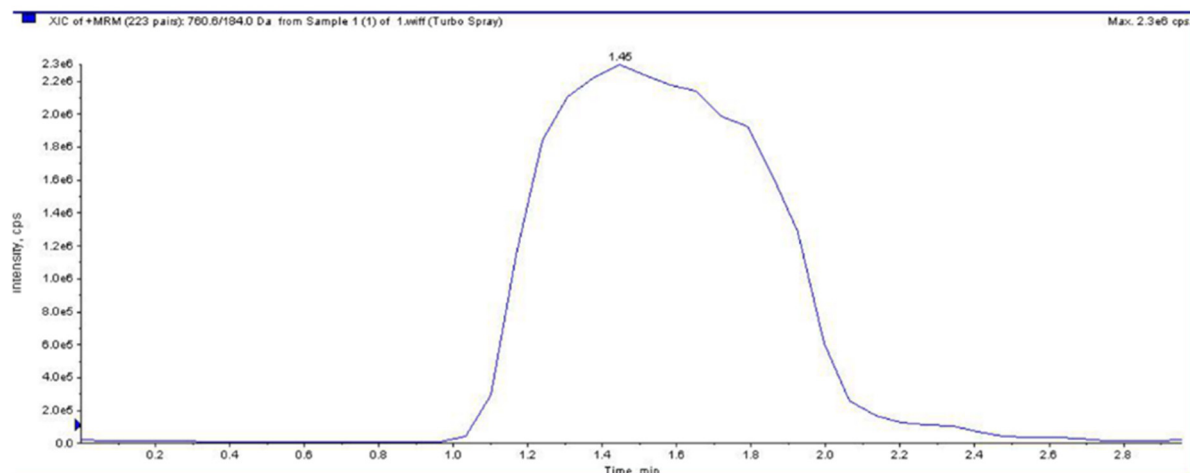

Suppl. Figure S9: An example of MS analysis/ result.
