# Supplementary material for: The Influence of Acitretin on Brain Lipidomics in Adolescent Mice—Implications for Pediatric and Adolescent Dermatological Therapy
Source: Int J Mol Sci. 2022 Dec 8;23(24):15535. doi: 10.3390/ijms232415535 (PMC9778912; doi:10.3390/ijms232415535)
Supplement: Supplementary file 1 [file ijms-23-15535-s001.zip › Kopie von Kopie von ijms-1971666_supplementary table1-3_proofs.xlsx]

## Sheet: A) raw data liver
Table S1: raw data of analyzed lipid species, mean, SEM, p value and FDR-corrected p value in liver tissue
	lipid species	mean	SEM	p value	FDR-corrected p value
phosphatidylcholine	PC aa C20:0	91.3611	15.4509	0.711602	0.863882
	PC aa C24:0	175.884	25.0109	0.165426	0.80582
	PC aa C26:0	163.211	23.5608	0.191994	0.80582
	PC aa C28:0	197.499	23.0302	0.0886249	0.80582
	PC aa C28:1	176.075	24.7927	0.159635	0.80582
	PC aa C30:0	104.011	18.3942	0.876718	0.966637
	PC aa C30:2	133.904	21.6594	0.375674	0.80582
	PC aa C32:0	78.4092	16.6809	0.297824	0.80582
	PC aa C32:1	77.4344	21.0279	0.387582	0.80582
	PC aa C32:2	89.9431	16.2071	0.663354	0.863882
	PC aa C32:3	135.874	24.2362	0.378299	0.80582
	PC aa C34:1	81.1816	15.7935	0.444992	0.80582
	PC aa C34:2	82.5521	15.2101	0.424049	0.80582
	PC aa C34:3	77.8379	16.7679	0.323828	0.80582
	PC aa C34:4	80.7447	15.2722	0.381131	0.80582
	PC aa C36:0	90.3151	15.0859	0.714605	0.863882
	PC aa C36:1	98.1917	16.794	0.941738	0.999845
	PC aa C36:2	101.264	15.8997	0.959579	0.999845
	PC aa C36:3	84.0711	15.8733	0.473769	0.80582
	PC aa C36:4	77.9236	15.1099	0.281272	0.80582
	PC aa C36:5	86.8188	17.6863	0.579695	0.863882
	PC aa C36:6	83.4341	16.6252	0.463872	0.80582
	PC aa C38:0	87.6089	13.541	0.55976	0.863882
	PC aa C38:1	82.3351	14.5721	0.408218	0.80582
	PC aa C38:3	95.8605	15.4457	0.861517	0.966637
	PC aa C38:4	92.7504	14.1143	0.72325	0.863882
	PC aa C38:5	74.3684	15.385	0.22148	0.80582
	PC aa C38:6	72.5566	14.8705	0.185642	0.80582
	PC aa C40:0	79.2688	14.634	0.378216	0.80582
	PC aa C40:1	91.1731	14.4458	0.715458	0.863882
	PC aa C40:2	88.3767	13.2297	0.651106	0.863882
	PC aa C40:3	79.2976	15.1278	0.433083	0.80582
	PC aa C40:4	76.028	15.724	0.271622	0.80582
	PC aa C40:5	78.5558	16.9599	0.325276	0.80582
	PC aa C40:6	89.2575	14.4024	0.641461	0.863882
	PC aa C42:0	100.285	16.4468	0.990491	0.999845
	PC aa C42:1	106.37	16.003	0.796735	0.925935
	PC aa C42:2	100.005	14.74	0.999845	0.999845
	PC aa C42:4	82.5063	14.3086	0.48724	0.80582
	PC aa C42:5	78.3043	14.3961	0.36504	0.80582
	PC aa C42:6	81.1793	14.7955	0.467397	0.80582
	PC aa C44:0	148.929	22.1905	0.245931	0.80582
	PC aa C48:0	88.9323	19.9353	0.693668	0.863882
phosphatidylcholin plasmalogens	PC ae C30:0	188.395	15.2801	0.0243234	0.184282
	PC ae C30:1	200.697	19.7302	0.0434042	0.185415
	PC ae C30:2	199.921	19.5849	0.0421477	0.185415
	PC ae C32:1	184.819	15.9408	0.025594	0.184282
	PC ae C32:2	191.938	19.8579	0.0570507	0.185415
	PC ae C34:0	113.193	4.93218	0.17164	0.306689
	PC ae C34:1	105.187	3.42868	0.482269	0.606726
	PC ae C34:2	109.389	3.96163	0.161069	0.306689
	PC ae C34:3	190.177	17.0659	0.0280191	0.184282
	PC ae C36:0	117.64	8.58263	0.173004	0.306689
	PC ae C36:1	108.124	4.24691	0.258928	0.374006
	PC ae C36:2	103.76	4.04427	0.556784	0.658017
	PC ae C36:3	96.4975	3.95324	0.666187	0.764156
	PC ae C36:4	97.5683	5.60382	0.767094	0.818236
	PC ae C36:5	111.876	6.07913	0.224213	0.349773
	PC ae C38:0	87.6788	3.25954	0.051204	0.185415
	PC ae C38:1	100.919	3.65134	0.87172	0.886739
	PC ae C38:2	107.748	1.42488	0.213613	0.347122
	PC ae C38:3	108.191	3.45831	0.104125	0.238874
	PC ae C38:4	97.0482	3.45078	0.526198	0.641304
	PC ae C38:5	93.5583	3.01535	0.390826	0.508074
	PC ae C38:6	76.2559	1.52572	0.320155	0.430553
	PC ae C40:0	93.1179	3.52285	0.275844	0.384211
	PC ae C40:1 / PC aa C40:8	109.348	3.49596	0.138467	0.284223
	PC ae C40:2	119.415	4.80074	0.0277362	0.184282
	PC ae C40:3	118.892	4.60739	0.0271605	0.184282
	PC ae C40:4	102.329	6.11722	0.760803	0.818236
	PC ae C40:5	100.772	3.94714	0.886739	0.886739
	PC ae C40:6	98.0296	4.48972	0.776275	0.818236
	PC ae C42:0	126.977	7.51511	0.0538071	0.185415
	PC ae C42:1	159.38	14.8613	0.0498051	0.185415
	PC ae C42:2	133.968	7.58727	0.0283511	0.184282
	PC ae C42:3	118.895	7.16967	0.0913317	0.222621
	PC ae C42:4	113.714	8.02449	0.234066	0.351099
	PC ae C42:5	115.593	7.67137	0.192886	0.327068
	PC ae C44:3	161.546	17.1422	0.0800521	0.208136
	PC ae C44:4	140.266	11.5931	0.0720261	0.200644
	PC ae C44:5	121.342	9.04445	0.120517	0.261119
	PC ae C44:6	141.803	12.705	0.0645	0.1935
lyso-phosphatidylcholine	lyso PC 6:X (Lyso PC 06:0 )	89.5792	5.3136	0.135897	0.296475
	lyso PC 10:X (Lyso PC 10:0 )	137.141	15.0449	0.17519	0.296475
	lyso PC 12:X (Lyso PC 12:0 )	91.7565	10.2819	0.800275	0.838383
	lyso PC 14:X (Lyso PC 14:0 )	131.255	13.6953	0.244223	0.316053
	Lyso PC 16:0	90.5371	4.96139	0.3141	0.363717
	Lyso PC 16:1	78.5218	6.04136	0.0918961	0.288816
	lyso PC 17:X (Lyso PC 17:0 )	172.044	13.4173	0.0189149	0.200908
	Lyso PC 18:0	115.897	6.28849	0.164244	0.296475
	Lyso PC 18:1	86.3378	6.38386	0.230205	0.316053
	lyso PC X:2 (Lyso PC 18:2 )	87.0915	5.57713	0.355212	0.390733
	Lyso PC 18:3	81.9362	8.90698	0.188895	0.296835
	Lyso PC 20:0	113.736	7.75681	0.314119	0.363717
	Lyso PC 20:3	98.5242	6.72497	0.886186	0.886186
	lyso PC X:4 (Lyso PC 20:4 )	83.7318	5.39569	0.170211	0.296475
	lyso PC X:5 (Lyso PC 20:5 )	115.763	4.34544	0.225822	0.316053
	Lyso PC 22:0	177.068	21.2271	0.105585	0.290358
	lyso PC X:6 (Lyso PC 22:6 )	80.0699	7.54449	0.127686	0.296475
	lyso PC 24:X (Lyso PC 24:0 )	168.513	16.9484	0.060585	0.266574
	Lyso PC 26:0	176.844	15.6008	0.0365288	0.200908
	Lyso PC 26:1	152.261	16.1688	0.0774255	0.283893
	Lyso PC 28:0	202.98	16.3366	0.0174717	0.200908
	Lyso PC 28:1	204.767	19.4941	0.0354531	0.200908
sphingomyeline	SM short-chain X<16 (SM C14:1 OH)	138.071	12.4333	0.0844462	0.633347
	SM C16:0	95.5947	3.75476	0.564397	0.925348
	SM C16:1	111.157	9.94342	0.566061	0.925348
	SM C16:1 OH	154.806	11.1679	0.0158683	0.238025
	SM C18:0	102.899	2.57944	0.772328	0.925348
	SM C18:1	117.515	9.24283	0.285974	0.925348
	SM C20:2	86.7797	4.76635	0.260998	0.925348
	SM C22:1 OH	94.197	5.29901	0.534406	0.925348
	SM C22:2 OH	96.1713	3.46202	0.720587	0.925348
	SM C22:3	88.5138	4.50851	0.381782	0.925348
	SM C24:0	87.4687	4.66494	0.323117	0.925348
	SM C24:1	97.4414	4.84887	0.834594	0.925348
	SM C24:1 OH	98.8147	7.30563	0.925348	0.925348
	SM C26:0	96.26	7.12206	0.756253	0.925348
	SM C26:1	101.919	5.44452	0.870497	0.925348
carnitine	C0	99.7695	5.35031	0.970752	0.999804
	C02	113.2	6.55252	0.187699	0.596423
	C03	117.054	6.90453	0.122291	0.596423
	C03 OH	132.37	4.37783	0.0245008	0.596423
	C03:1	123.025	8.82057	0.218203	0.596423
	C04	107.793	5.70122	0.532665	0.858205
	C04 OH / C3-DC	100.2	4.54762	0.97628	0.999804
	C04:1	103.035	8.27674	0.815953	0.9821
	C05	92.8348	3.43943	0.607023	0.858205
	C05 M DC	106.25	3.20935	0.198328	0.596423
	C05 OH / C3-DC-M	93.0731	6.1999	0.379616	0.741156
	C05:1	90.8482	6.63042	0.42202	0.780532
	C05:1 DC	126.516	11.8095	0.16588	0.596423
	C06 / C4:1-DC	128.421	8.10467	0.0668986	0.596423
	C06 OH / C5-DC	103.982	5.24362	0.555093	0.858205
	C06:1	118.001	6.77474	0.148751	0.596423
	C7X (C07 DC)	126.066	4.47235	0.115676	0.596423
	C08	90.5766	11.3713	0.580589	0.858205
	C08:1	109.029	6.89615	0.517973	0.858205
	C9X (C09)	108.155	5.49531	0.43786	0.780532
	C10	113.305	4.35579	0.0379093	0.596423
	C10:1	126.79	3.64904	0.145019	0.596423
	C10:2	57.0277	4.92678	0.277947	0.633102
	C12	114.027	4.12162	0.140023	0.596423
	C12 DC	122.664	9.55207	0.20586	0.596423
	C12:1	126.353	7.3225	0.11326	0.596423
	C14	102.742	8.31886	0.838378	0.9821
	C14:1	129.688	8.77933	0.0841864	0.596423
	C14:1 OH	108.995	5.1095	0.378479	0.741156
	C14:2	95.888	8.68713	0.67734	0.925698
	C14:2 OH	115.085	9.11949	0.254889	0.633102
	C16	100.004	7.33825	0.999804	0.999804
	C16 OH	87.3451	8.93598	0.270694	0.633102
	C16:1	99.2846	7.9038	0.955997	0.999804
	C16:1 OH	123.966	17.2319	0.344479	0.741156
	C16:2	96.556	12.0887	0.834671	0.9821
	C16:2 OH	101.694	7.06148	0.904512	0.999804
	C18:0	106.769	9.29477	0.599049	0.858205
	C18:1	96.7299	7.81734	0.758526	0.9821
	C18:1 OH	103.296	7.86161	0.80337	0.9821
	C18:2	101.812	7.0801	0.865205	0.985372
triacylglycerides	C48:0	86.8922	10.8521	0.599033	0.929623
	C50:0	112.43	13.1334	0.589306	0.929623
	C50:1	106.006	14.4296	0.817135	0.929623
	C50:2	109.823	15.9863	0.714211	0.929623
	C50:3	112.456	18.0866	0.690402	0.929623
	C52:0	103.996	15.9913	0.890251	0.945892
	C52:1	136.634	13.3938	0.179907	0.929623
	C52:2	142.854	14.4054	0.152378	0.929623
	C52:3	138.39	11.6761	0.135515	0.929623
	C52:4	124.272	12.4523	0.354696	0.929623
	C52:5	117.664	12.0814	0.566053	0.929623
	C54:2	99.8229	12.1566	0.99414	0.99414
	C54:3	111.264	12.3746	0.640175	0.929623
	C54:4	121.977	10.7939	0.279868	0.929623
	C54:5	115.627	11.0184	0.446893	0.929623
	C54:6	92.4692	8.74952	0.732683	0.929623
	C54:7	94.4713	11.0117	0.820256	0.929623
PCaa processed and normalized to total	Pcaa total	85.2771	15.0413	0.497597	0.684196
	PC aa C20:0/tot	108.156	5.93243	0.385554	0.582613
	PC aa C24:0/tot	207.736	20.2529	0.0419953	0.173978
	PC aa C26:0/tot	198.168	20.2672	0.0514025	0.173978
	PC aa C28:0/tot	237.229	18.2648	0.0146567	0.107482
	PC aa C28:1/tot	208.567	20.3966	0.0439428	0.173978
	PC aa C30:0/tot	119.98	9.55431	0.185475	0.408046
	PC aa C30:2/tot	161.994	16.2835	0.0615128	0.193326
	PC aa C32:0/tot	89.8743	3.86494	0.150573	0.348697
	PC aa C32:1/tot	89.0028	6.71961	0.370831	0.582613
	PC aa C32:2/tot	105.325	5.54272	0.544114	0.704148
	PC aa C32:3/tot	158.083	18.2364	0.0992578	0.272959
	PC aa C34:1/tot	98.4933	4.61377	0.851988	0.914328
	PC aa C34:2/tot	96.8551	1.41658	0.243876	0.455827
	PC aa C34:3/tot	90.8405	3.10322	0.0451051	0.173978
	PC aa C34:4/tot	94.6765	3.17804	0.265409	0.467119
	PC aa C36:0/tot	111.627	4.07839	0.117692	0.297197
	PC aa C36:1/tot	115.415	3.08656	0.00176735	0.0164417
	PC aa C36:2/tot	119.584	2.81812	0.00106252	0.0164417
	PC aa C36:3/tot	98.4077	2.71666	0.789907	0.868897
	PC aa C36:4/tot	90.7024	1.31557	0.000487051	0.0164417
	PC aa C36:5/tot	100.002	3.02507	0.999756	0.999756
	PC aa C36:6/tot	96.7437	5.21312	0.625988	0.765096
	PC aa C38:0/tot	103.742	5.01065	0.715853	0.851285
	PC aa C38:1/tot	97.4122	2.52102	0.533324	0.704148
	PC aa C38:3/tot	112.486	1.71444	0.00186837	0.0164417
	PC aa C38:4 /tot	107.174	3.51068	0.212074	0.424148
	PC aa C38:5 Tot	86.9183	2.7384	0.0172559	0.108466
	PC aa C38:6 /tot	84.299	3.02179	0.00125724	0.0164417
	PC aa C40:0 /tot	96.9351	8.39713	0.755431	0.868897
	PC aa C40:1 /tot	111.342	7.7048	0.32186	0.544686
	PC aa C40:2 /tot	110.418	7.79239	0.358775	0.582613
	PC aa C40:3 /tot	98.0643	4.42134	0.785524	0.868897
	PC aa C40:4 /tot	90.1094	3.93202	0.0694654	0.203765
	PC aa C40:5 /tot	90.6978	2.09128	0.0294356	0.161896
	PC aa C40:6 /tot	106.042	3.9998	0.397236	0.582613
	PC aa C42:0 /tot	119.716	12.2131	0.248633	0.455827
	PC aa C42:1 /tot	125.946	10.307	0.121581	0.297197
	PC aa C42:2 /tot	123.86	10.3704	0.198143	0.415157
	PC aa C42:4 /tot	100.738	4.03624	0.906104	0.949252
	PC aa C42:5 /tot	94.6503	4.76437	0.411955	0.584711
	PC aa C42:6 /tot	99.9379	4.49032	0.993496	0.999756
	PC aa C44:0 /tot	177.835	18.5023	0.050891	0.173978
	PC aa C48:0 /tot	111.844	17.0866	0.625495	0.765096
	PC aa X:0 (PC aa SFA )	96.545	17.1323	0.885007	0.885007
	PC aa X:1 (PC aa MUFA )	85.0082	16.1243	0.53783	0.740035
	PC aa PUFA	84.9908	14.9578	0.483508	0.740035
	PC aa SFA/MUFA	109.406	5.92727	0.272954	0.624811
	PC aa SFA/PUFA	113.89	8.79768	0.284434	0.624811
	PC aa MUFA /PUFA	102.728	4.76038	0.72666	0.787215
	PC aa X:2	90.3797	15.4157	0.67493	0.787215
	PC aa X:3	87.1791	15.698	0.569258	0.740035
	PC aa X:4	85.2153	14.4289	0.465139	0.740035
	PC aa X:5	76.2295	15.8365	0.26124	0.624811
	PC aa X:6	77.6078	14.5365	0.288375	0.624811
	PC aaX:4/X:6	109	2.00268	0.00703117	0.0457026
	PC aaX:4/(X5+X6)	109.749	1.90502	0.00387051	0.0457026
	PC aa short (<32:X)	153.505	22.3076	0.215541	0.615711
	PC aa medium (32-36:X)	85.4265	15.5113	0.514127	0.615711
	PC aa long (>36:X)	83.8968	14.4988	0.439208	0.615711
	PC aa <30:X	166.12	23.1004	0.169698	0.615711
	PC aa 30:X	115.082	19.503	0.615711	0.615711
	PC aa 32:X	79.1446	17.7316	0.343682	0.615711
	PC aa 34:X	81.8812	15.328	0.421703	0.615711
	PC aa 36:X	88.617	15.5946	0.610495	0.615711
	PC aa 38:X	83.3407	14.5087	0.417642	0.615711
	PC aa 40:X	86.7596	14.715	0.559411	0.615711
	PC aa 42:X	86.7047	14.2152	0.581011	0.615711
	PC aa >42:X	134.612	21.4566	0.356939	0.615711
	PC aa X:0/tot (PC aa SFA/tot )	112.92	8.0904	0.274341	0.548681
	PC aa X:1/tot (PC aa MUFA/tot )	102.081	3.96145	0.753667	0.753667
	PC aa PUFA/tot	99.3306	0.80208	0.576274	0.724361
	PC aa X:2/tot	106.331	1.17113	0.0361179	0.0963144
	PC aa X:3/tot	102.123	1.39282	0.552579	0.724361
	PC aa X:4/tot	98.865	1.59467	0.633816	0.724361
	PC aa X:5/tot	88.7893	2.30364	0.0089721	0.0412529
	PC aa X:6/tot	90.8102	2.39296	0.0103132	0.0412529
	PC aa short (<32:X)/tot	183.284	17.4694	0.0395461	0.158184
	PC aa medium (32-36:X)/tot	100.544	1.12244	0.735738	0.735738
	PC aa long (>36:X)/tot	97.7765	2.18125	0.451427	0.576439
	PC aa <30:X/tot	199.197	18.714	0.0353318	0.158184
	PC aa 30:X/tot	135.135	12.3864	0.0993784	0.238508
	PC aa 32:X/tot	90.8913	4.57607	0.234288	0.447419
	PC aa 34:X/tot	97.1383	2.00741	0.298279	0.447419
	PC aa 36:X/tot	103.835	1.11766	0.0183105	0.158184
	PC aa 38:X/tot	96.8348	2.23175	0.296399	0.447419
	PC aa 40:X/tot	102.657	3.29515	0.651839	0.711097
	PC aa 42:X/tot	105.646	5.83466	0.480366	0.576439
	PC aa >42:X/tot	162.108	17.5067	0.0690517	0.207155
Pcae processed and normalized to total	Pcae total	105.301	2.73579	0.347058	0.4253
	PC ae C30:0/tot	180.902	14.2792	0.0198914	0.147783
	PC ae C30:1/tot	191.27	18.0797	0.0348132	0.14862
	PC ae C30:2/tot	189.559	18.1411	0.0371549	0.14862
	PC ae C32:1/tot	175.403	14.2069	0.0176055	0.147783
	PC ae C32:2/tot	183.529	18.4149	0.0480918	0.166517
	PC ae C34:0/tot	107.971	3.97932	0.168708	0.305454
	PC ae C34:1/tot	100.159	3.55869	0.976587	0.976587
	PC ae C34:2/tot	103.539	2.49919	0.389696	0.458466
	PC ae C34:3/tot	179.348	15.0896	0.0202371	0.147783
	PC ae C36:0/tot	110.686	6.49496	0.242583	0.373205
	PC ae C36:1/tot	102.599	3.12862	0.537087	0.596763
	PC ae C36:2/tot	98.4476	4.45705	0.801906	0.822468
	PC ae C36:3/tot	92.4019	4.04258	0.173258	0.305454
	PC ae C36:4/tot	92.3838	3.98303	0.155256	0.305454
	PC ae C36:5/tot	106.146	4.67918	0.311359	0.414725
	PC ae C38:0/tot	83.2034	3.2701	0.00374981	0.147783
	PC ae C38:1/tot	95.3839	1.82942	0.211349	0.338159
	PC ae C38:2/tot	102.977	2.0103	0.300643	0.414725
	PC ae C38:3/tot	101.858	1.91081	0.632552	0.68384
	PC ae C38:4/tot	91.5684	4.04027	0.179012	0.305454
	PC ae C38:5/tot	89.2728	3.52181	0.0616479	0.166517
	PC ae C38:6/tot	75.7473	2.6822	0.183273	0.305454
	PC ae C40:0/tot	88.8727	4.12879	0.0221674	0.147783
	PC ae C40:1 / PC aa C40:8/tot	103.819	2.77279	0.301305	0.414725
	PC ae C40:2/tot	113.126	4.14694	0.0562406	0.166517
	PC ae C40:3 / PC aa C40:10 /tot	112.484	4.78877	0.122075	0.257001
	PC ae C40:4 /tot	96.8567	6.64019	0.69791	0.734642
	PC ae C40:5 /tot	95.0582	2.87999	0.278972	0.413291
	PC ae C40:6 /tot	92.9169	4.93924	0.321412	0.414725
	PC ae C42:0 /tot	120.175	5.54084	0.0367018	0.14862
	PC ae C42:1 /tot	151.159	12.4299	0.0302335	0.14862
	PC ae C42:2 /tot	127.563	6.06189	0.0173171	0.147783
	PC ae C42:3 /tot	112.358	5.32202	0.0942202	0.221695
	PC ae C42:4 /tot	107.005	6.84843	0.455779	0.52089
	PC ae C42:5 /tot	108.86	6.28533	0.350872	0.4253
	PC ae C44:3/tot	153.445	15.0118	0.0662567	0.166517
	PC ae C44:4/tot	133.231	10.0978	0.0666066	0.166517
	PC ae C44:5 / PC aa C44:12/ tot	114.106	6.43238	0.117065	0.257001
	PC ae C44:6/tot	133.401	10.6063	0.0594154	0.166517
	PC ae X:0 (PC ae SFA )	95.3433	2.61899	0.405568	0.555616
	PC ae X:1 (PC ae MUFA )	117.643	5.10453	0.0498895	0.108094
	PC ae PUFA	106.9	2.97228	0.225729	0.419211
	PC ae SFA/MUFA	82.2157	5.07303	0.0022995	0.0298935
	PC ae SFA/PUFA	89.6667	3.5607	0.0230201	0.0997539
	PC ae MUFA /PUFA	109.913	2.87302	0.0186787	0.0997539
	PC ae X:2	114.437	3.44177	0.0408271	0.10615
	PC ae X:3	118.232	5.22362	0.0394512	0.10615
	PC ae X:4	99.8108	2.83036	0.964792	0.964792
	PC ae X:5	101.516	3.60344	0.798352	0.864882
	PC ae X:6	91.7664	3.19289	0.427397	0.555616
	PC aeX:4/X:6	104.927	1.37208	0.421628	0.555616
	PC aeX:4/(X5+X6)	101.221	1.83885	0.762471	0.864882
	PC ae 30:X (PC ae short (<32:X) )	198.004	18.6747	0.0375191	0.130881
	PC ae medium (32-36:X)	113.058	4.49006	0.0967589	0.161265
	PC ae long (>36:X)	100.998	2.3091	0.84187	0.84187
	PC ae 32:X	186.777	16.9767	0.0328345	0.130881
	PC ae 34:X	115.41	5.24696	0.0868034	0.161265
	PC ae 36:X	104.053	2.90643	0.462885	0.595581
	PC ae 38:X	96.4527	1.89664	0.476465	0.595581
	PC ae 40:X	98.6181	2.89788	0.791884	0.84187
	PC ae 42:X	130.626	8.42012	0.0392644	0.130881
	PC ae >42:X	139.885	12.1102	0.0678661	0.161265
	PC ae X:0/tot (PC ae SFA/tot )	90.8461	2.75642	0.00791567	0.0196311
	PC ae X:1/tot (PC ae MUFA/tot )	111.469	2.71733	0.00455568	0.0196311
	PC ae PUFA/tot	101.412	1.13971	0.385355	0.385355
	PC ae X:2/tot	108.663	1.87387	0.00854354	0.0196311
	PC ae X:3/tot	111.779	2.92321	0.00981554	0.0196311
	PC ae X:4/tot	94.3045	2.70082	0.203863	0.271818
	PC ae X:5/tot	96.2519	2.50745	0.257227	0.293974
	PC ae X:6/tot	88.351	3.47655	0.0937311	0.14997
	PC ae 30:X/tot (PC ae short (<32:X)/tot )	188.774	17.1676	0.0303409	0.0565757
	PC ae medium (32-36:X)/tot	107.211	2.53002	0.0339454	0.0565757
	PC ae long (>36:X)/tot	95.9914	1.50956	0.0267527	0.0565757
	PC ae 32:X/tot	177.622	15.3286	0.0242676	0.0565757
	PC ae 34:X/tot	109.497	3.80517	0.0631343	0.0789179
	PC ae 36:X/tot	98.7504	1.79328	0.633484	0.633484
	PC ae 38:X/tot	91.688	1.71467	0.00345721	0.0345721
	PC ae 40:X/tot	93.8474	3.20884	0.0942951	0.104772
	PC ae 42:X/tot	123.559	6.10955	0.0162598	0.0565757
	PC ae >42:X/tot	132.172	9.88205	0.0520943	0.0744204
	Pcae total/aa	126.681	12.972	0.209535	0.344235
	PC ae X:0 /aa (PC ae SFA/aa )	105.026	13.765	0.790165	0.790165
	PC ae X:1/aa (PC ae MUFA/aa )	134.869	12.1647	0.122856	0.320844
	PC ae PUFA/aa	129.457	13.4503	0.19028	0.344235
	PC ae SFA/MUFA /aa	76.9494	9.77423	0.0342695	0.320844
	PC ae SFA/PUFA /aa	82.3531	10.9582	0.139498	0.320844
	PC ae MUFA /PUFA /aa	106.168	3.75608	0.348612	0.425019
	PC ae X:2 /aa	129.547	13.402	0.188467	0.344235
	PC ae X:3 /aa	138.109	13.0219	0.103673	0.320844
	PC ae X:4 /aa	121.553	13.7556	0.315846	0.425019
	PC ae X:5 /aa	137.376	13.9792	0.132334	0.320844
	PC ae X:6 /aa	121.348	14.1216	0.372346	0.428198
	PC ae short (<32:X) /aa	127.76	12.5905	0.200081	0.344235
	PC ae medium (32-36:X) /aa	135.003	13.4878	0.13776	0.320844
	PC ae long (>36:X) /aa	125.208	13.6934	0.245265	0.376073
	PC ae 30:X (PC ae short-chain < 32:X) /aa	174.213	16.8678	0.0428574	0.320844
	PC ae 32:X /aa	248.868	19.3005	0.0142527	0.320844
	PC ae 34:X /aa	140.363	13.1602	0.100164	0.320844
	PC ae 36:X /aa	121.276	13.4981	0.313246	0.425019
	PC ae 38:X /aa	120.615	14.4365	0.351103	0.425019
	PC ae 40:X /aa	113.924	12.9886	0.485353	0.531577
	PC ae 42:X /aa	144.524	12.4677	0.0662507	0.320844
	PC ae >42:X /aa	109.957	18.7189	0.698828	0.730593
PCax	PC ax tot	85.8978	14.4204	0.502584	0.846457
	PC ax X:0 (PC ax SFA )	96.1734	11.6083	0.822452	0.822452
	PC ax X:1 (PC ax MUFA )	86.769	14.8787	0.565854	0.690233
	PC ax PUFA	85.3428	14.6218	0.486463	0.690233
	PC ax SFA/MUFA	107.282	3.91774	0.323116	0.690233
	PC ax SFA/PUFA	113.911	7.23603	0.211959	0.690233
	PC ax MUFA /PUFA	104.571	4.80086	0.551003	0.690233
	PC ax X:2	90.7444	15.0909	0.681999	0.738832
	PC ax X:3	87.9977	15.101	0.584044	0.690233
	PC ax X:4	85.4114	14.1675	0.464521	0.690233
	PC ax X:5	76.9759	15.147	0.261353	0.690233
	PC ax X:6	77.7484	14.3455	0.286376	0.690233
	PC axX:4/X:6	109.086	1.99066	0.00656715	0.0426864
	PC axX:4/(X5+X6)	109.509	1.8421	0.0039026	0.0426864
	PC ax short (<32:X) (PC aa <32:X PC ae 30:X)	156.996	21.4607	0.180631	0.606891
	PC ax medium (32-36:X)	85.7407	15.2553	0.518345	0.610523
	PC ax long (>36:X)	84.92	13.3844	0.441375	0.606891
	PC ax 30:X (PC aa 30:X PC ae short-chain < C32:X)	136.326	17.246	0.236744	0.606891
	PC ax 32:X	81.3335	17.0172	0.388496	0.606891
	PC ax 34:X	82.162	15.1434	0.425037	0.606891
	PC ax 36:X	88.819	15.3195	0.612004	0.612004
	PC ax 38:X	83.6609	14.057	0.414691	0.606891
	PC ax 40:X	89.0083	11.4839	0.555021	0.610523
	PC ax 42:X	112.207	8.28827	0.406113	0.606891
	PC ax >42:X	139.108	12.7186	0.086054	0.606891
	PC ax X:0/tot (PC ax SFA/tot )	112.473	6.43136	0.207331	0.414662
	PC ax X:1/tot (PC ax MUFA/tot )	103.454	3.92513	0.589918	0.589918
	PC ax PUFA/tot	98.9583	0.885209	0.406241	0.563686
	PC ax X:2/tot	105.891	1.14018	0.049412	0.131765
	PC ax X:3/tot	102.35	1.31786	0.493225	0.563686
	PC ax X:4/tot	98.3085	1.70216	0.484809	0.563686
	PC ax X:5/tot	89.0557	2.11485	0.00785755	0.0317624
	PC ax X:6/tot	90.2291	2.51146	0.00794061	0.0317624
	PC ax short (<32:X)/tot	186.513	17.4555	0.0355634	0.0948292
	PC ax medium (32-36:X)/tot	100.072	1.08408	0.96465	0.96465
	PC ax long (>36:X)/tot	98.4397	2.01903	0.581541	0.639695
	PC ax 30:X/tot	163.158	14.7521	0.038387	0.0948292
	PC ax 32:X/tot	93.0949	4.91892	0.375996	0.474132
	PC ax 34:X/tot	96.6107	1.95466	0.22721	0.381862
	PC ax 36:X/tot	103.213	1.09395	0.0418506	0.0948292
	PC ax 38:X/tot	96.4987	2.23195	0.243003	0.381862
	PC ax 40:X/tot	104.955	3.70625	0.387926	0.474132
	PC ax 42:X/tot	135.416	10.1935	0.0431042	0.0948292
	PC ax >42:X/tot	167.339	15.1169	0.0344329	0.0948292
	PC ax C30:0	112.538	16.7219	0.620803	0.911301
	PC ax C30:2	144.812	20.0814	0.233739	0.818137
	PC ax C32:1	83.2716	18.7982	0.50038	0.846457
	PC ax C32:2	101.676	14.2632	0.939153	0.957805
	PC ax C34:1	81.4581	15.5676	0.446648	0.846457
	PC ax C34:2	82.6555	15.1296	0.425053	0.846457
	PC ax C34:3	79.8778	15.9651	0.360185	0.846457
	PC ax C36:0	92.6428	13.3223	0.762608	0.938594
	PC ax C36:1	98.5645	15.9937	0.951845	0.957805
	PC ax C36:2	101.3	15.6289	0.957805	0.957805
	PC ax C36:3	84.1925	15.6803	0.472921	0.846457
	PC ax C36:4	78.0327	14.9912	0.280719	0.818137
	PC ax C36:5	87.7611	16.7974	0.592512	0.911301
	PC ax C38:0	87.6534	4.95708	0.199512	0.818137
	PC ax C38:1	86.8858	9.83395	0.411086	0.846457
	PC ax C38:3	96.1633	14.9517	0.86815	0.957805
	PC ax C38:4	92.8102	13.8817	0.721486	0.923502
	PC ax C38:5	74.7087	15.0261	0.219317	0.818137
	PC ax C38:6	72.5752	14.7881	0.183702	0.818137
	PC ax C40:0	92.6048	3.30734	0.252327	0.818137
	PC ax C40:1 / PC aa C40:8	107.995	3.10971	0.214056	0.818137
	PC ax C40:2	102.9	7.23132	0.846556	0.957805
	PC ax C40:3 / PC aa C40:10	96.2956	7.35728	0.805312	0.954443
	PC ax C40:4	83.6733	9.50279	0.281235	0.818137
	PC ax C40:5	79.7004	15.656	0.323257	0.846457
	PC ax C40:6	89.4359	14.0326	0.640085	0.911301
	PC ax C42:0	118.671	7.95317	0.149073	0.818137
	PC ax C42:1	147.414	13.6961	0.0689294	0.818137
	PC ax C42:2	123.327	8.0762	0.150462	0.818137
	PC ax C42:4	93.4953	8.33667	0.688312	0.91775
	PC ax C42:5	93.108	7.99301	0.654997	0.911301
	PC ae/aa C30:0	192.932	16.0997	0.0193124	0.199561
	PC ae/aa C30:2	139.293	16.5078	0.188561	0.434757
	PC ae/aa C32:1	237.098	18.5095	0.0152274	0.199561
	PC ae/aa C32:2	216.244	20.1069	0.0331334	0.256784
	PC ae/aa C34:1	120.844	11.3579	0.32372	0.477872
	PC ae/aa C34:2	135.559	13.6409	0.132267	0.434757
	PC ae/aa C34:3	259.677	20.5725	0.0171963	0.199561
	PC ae/aa C36:0	124.082	13.6606	0.27259	0.444752
	PC ae/aa C36:1	114.094	13.3622	0.473371	0.564404
	PC ae/aa C36:2	105.016	14.3334	0.799349	0.825994
	PC ae/aa C36:3	116.434	12.4682	0.411677	0.531749
	PC ae/aa C36:4	128.419	14.5339	0.241664	0.434757
	PC ae/aa C36:5	130.912	13.9888	0.215477	0.434757
	PC ae/aa C38:0	99.5591	14.2658	0.982145	0.982145
	PC ae/aa C38:1	123.743	13.9814	0.292869	0.453947
	PC ae/aa C38:3	115.899	13.906	0.441309	0.547224
	PC ae/aa C38:4	109.749	14.8655	0.635277	0.703762
	PC ae/aa C38:5	128.165	13.9459	0.231551	0.434757
	PC ae/aa C38:6	109.366	14.4851	0.759576	0.81196
	PC ae/aa C40:0	117.987	13.9558	0.398874	0.531749
	PC ae/aa C40:1	117.572	13.2509	0.404392	0.531749
	PC ae/aa C40:2	125.965	13.2847	0.250669	0.434757
	PC ae/aa C40:3	137.136	12.1125	0.123158	0.434757
	PC ae/aa C40:4	133.041	12.4916	0.156444	0.434757
	PC ae/aa C40:5	133.799	14.1923	0.171783	0.434757
	PC ae/aa C40:6	109.879	13.9976	0.635656	0.703762
	PC ae/aa C42:0	129.011	14.3659	0.25244	0.434757
	PC ae/aa C42:1	151.097	17.2825	0.12226	0.434757
	PC ae/aa C42:2	126.977	11.9095	0.198763	0.434757
	PC ae/aa C42:4	131.357	15.2197	0.226357	0.434757
	PC ae/aa C42:5	144.864	14.7143	0.105973	0.434757
lyso-PC processed and normalized to total	total Lyso PC	93.5687	3.85097	0.48474	0.557451
	lyso PC X:0 (lyso PC SFA )	105.186	3.94964	0.483289	0.621371
	lyso PC X:1 (lyso PC MUFA )	97.9252	4.53617	0.831171	0.831171
	lyso PC PUFA	85.3445	5.79493	0.245384	0.621371
	lyso PC SFA/MUFA	106.134	3.49147	0.33212	0.621371
	lyso PC SFA/PUFA	119.455	6.45003	0.106702	0.621371
	lyso PC MUFA /PUFA	110.961	6.24917	0.371358	0.621371
	lyso PC X:3	95.2451	6.94279	0.656658	0.73874
	lyso PCX:4/X:6	105.052	3.38835	0.336769	0.621371
	lyso PCX:4/(X5+X6)	103.83	3.26266	0.441542	0.621371
	lyso PC short (<16:X)	91.7119	4.80968	0.226043	0.425396
	lyso PC medium (16-20X)	90.9972	5.02446	0.401066	0.515656
	lyso PC long (>20:X)	108.35	7.76862	0.484694	0.537217
	lyso PC 16:X	90.0575	4.87205	0.283597	0.425396
	lyso PC 18:X	92.8029	5.45836	0.537217	0.537217
	lyso PC 20:X	86.2813	5.43664	0.226649	0.425396
	lyso PC 22:X	87.4936	6.18442	0.26885	0.425396
	lyso PC 26:X	164.464	15.6251	0.0470418	0.211688
	lyso PC 28:X	203.956	17.729	0.0241917	0.211688
	lyso PC X:0 /total (lyso PC SFA /total )	110.792	3.19463	0.0758151	0.378504
	lyso PC X:1/total (lyso PC MUFA/total )	103.359	3.90052	0.665823	0.798988
	lyso PC PUFA/total	92.2454	3.0576	0.126168	0.378504
	Lyso PC 18:2/total (lyso PC X:2/total )	95.1416	3.55653	0.434173	0.525578
	lyso PC X:3/total	100.664	3.72742	0.905732	0.905732
	Lyso PC 20:4/total (lyso PC X:4/total )	90.1453	2.54734	0.0255665	0.102618
	Lyso PC 20:5/total (lyso PC X:5/total )	124.539	3.74725	0.0164987	0.0970409
	Lyso PC 22:6/total (lyso PC X:6/total )	85.6826	4.29297	0.045711	0.17965
	lyso PCX:4/X:6/total	109.034	6.18024	0.447138	0.753486
	lyso PCX:4/(X5+X6)/total	107.764	6.03527	0.502324	0.753486
	lyso PC short (<16:X)/total	95.5575	6.76001	0.699446	0.786877
	lyso PC medium (16-20X)/total	97.554	1.92311	0.320105	0.411563
	lyso PC long (>20:X)/total	115.443	7.06355	0.120286	0.270644
	Lyso PC 06:0/total (lyso PC 6:X/total )	93.1762	7.22243	0.567314	0.593101
	Lyso PC 10:0/total (lyso PC 10:X/total )	146.627	16.5631	0.125552	0.205887
	Lyso PC 12:0/total (lyso PC 12:X/total )	104.018	8.63006	0.862291	0.862291
	Lyso PC 14:0/total (lyso PC 14:X/total )	138.668	12.9241	0.134274	0.205887
	lyso PC 16:X/total	95.3062	2.01397	0.229663	0.344494
	Lyso PC 17:0/total (lyso PC 17:X/total )	177.557	12.4415	0.0117186	0.0970409
	lyso 18:X/total	99.9798	2.92898	0.995798	0.995798
	lyso 20:X/total	92.6224	2.48892	0.0643475	0.193043
	lyso 22:X/total	93.4189	2.84901	0.19577	0.344494
	Lyso PC 24:0/total (lyso 24:X/total )	175.798	16.9363	0.047717	0.121943
	lyso 26:X/total	171.83	16.0166	0.0417195	0.187738
	lyso 28:X/total	213.422	18.2343	0.0231292	0.187738
	Lyso PC 16:0/total	95.9225	2.14005	0.274156	0.350311
	Lyso PC 16:1/total	80.9421	5.30069	0.179492	0.25802
	Lyso PC 18:0/total	122.651	3.5419	0.0021258	0.0488933
	Lyso PC 18:1/total	91.1939	4.45809	0.242887	0.328612
	Lyso PC 18:3/total	87.4791	5.40405	0.0858993	0.179608
	Lyso PC 20:0/total	121.2	7.22585	0.097121	0.17965
	Lyso PC 20:3/total	103.859	3.70888	0.517013	0.566253
	Lyso PC 22:0/total	180.73	21.2252	0.101542	0.121943
	Lyso PC 26:0/total	186.302	15.7707	0.0267698	0.102618
	Lyso PC 26:1/total	157.854	16.7561	0.0786126	0.179608
	Lyso PC 28:0/total	209.605	16.4849	0.0168767	0.0970409
	Lyso PC 28:1/total	216.65	20.1757	0.0326765	0.107366
	total Lyso PC/total Pcaa	108.95	14.2775	0.701698	0.978616
	lyso PC SFA/Pcaa SFA	108.262	12.9153	0.708637	0.978616
	lyso PC MUFA/Pcaa MUFA	110.711	13.4058	0.643147	0.978616
	lyso PC PUFA/Pcaa PUFA	100.665	15.646	0.978616	0.978616
	lyso PC X:4 (20:4)/Pcaa X:4	99.1996	15.0938	0.972873	0.978616
	lyso PC X:5 (C20:5)/Pcaa X:5	149.654	14.0452	0.117591	0.836387
	lyso PC X:6 (22:6)/Pcaa X:6	105.392	18.8758	0.843895	0.978616
	lyso PCX:4/X:6 (20:4/22:6) /Pcaa X:4/X:6	96.434	3.068	0.426206	0.978616
	lyso PCX:4/(X5+X6)/Pcaa X:4(X5+X6)	94.4725	2.9093	0.255067	0.836387
	lyso PC short (<16:X)/Pcaa short (<16:X)	65.3833	20.2752	0.14361	0.836387
	lyso PC medium (16-20X)/Pcaa medium (16-20X)	104.422	14.2038	0.852225	0.978616
	lyso PC long (>20:X)/Pcaa long (>20:X)	134.71	19.1677	0.278796	0.836387
SM processed and normalized to total	total SM	93.9856	3.61445	0.578919	0.745877
	SM non OH	93.3476	3.72203	0.549623	0.824435
	SM OH	99.803	3.96263	0.982798	0.982798
	SM OH/non OH	105.746	3.33866	0.255051	0.765153
	SM SFA	92.7881	3.42326	0.443568	0.665353
	SM MUFA	98.4054	4.11641	0.886182	0.886182
	SM PUFA	88.8616	4.24662	0.384417	0.665353
	SM SFA/MUFA	93.7366	2.67567	0.104708	0.314125
	SM SFA/PUFA	102.512	2.69307	0.658871	0.790645
	SM MUFA/PUFA	109.854	3.15975	0.0775537	0.314125
	SM medium chain (X16-20)	98.3769	3.54296	0.838842	0.838842
	Sm long chain (X>20)	92.7379	4.16619	0.541276	0.811913
	total SM/Pcaa	109.903	13.7035	0.682949	0.926119
	SM SFA /PCaa SFA	97.8552	14.1504	0.926119	0.926119
	SM MUFA /PCaa MUFA	109.713	12.4166	0.684882	0.926119
	SM PUFA/ PCaa PUFA	104.729	15.157	0.856486	0.926119
	SM/PCaa short chain	87.2274	11.6645	0.54788	0.926119
	SM/PCaa medium chain (X16-20)	113.555	12.2191	0.522029	0.926119
	SM/PCaa long chain	112.047	15	0.644575	0.926119
	SM short chain (X<16)/tot (SM C14:1 OH/tot )	146.867	13.8767	0.0627494	0.188248
	SM C16:0/tot	99.6623	3.34314	0.958849	0.958849
	SM C16:1/tot	117.483	11.4136	0.41742	0.667873
	SM C16:1 OH/tot	162.424	12.7027	0.0187549	0.23804
	SM C18:0/tot	109.377	3.24091	0.077453	0.290196
	SM C18:1/tot	125.914	10.2581	0.108824	0.290196
	SM C20:2/tot	92.0007	2.64267	0.0971639	0.290196
	SM C22:1 OH/tot	98.4796	2.44834	0.718607	0.821265
	SM C22:2 OH/tot	102.623	3.31341	0.558453	0.745877
	SM C22:3/tot	94.8188	2.33828	0.204598	0.467654
	SM C24:0/tot	93.4062	1.53196	0.029755	0.23804
	SM C24:1/tot	104.081	2.43609	0.254883	0.509766
	SM C24:1 OH/tot	104.641	7.03883	0.606025	0.745877
	SM C26:0/tot	101.895	8.34864	0.869961	0.927958
	SM C26:1/tot	108.832	6.03317	0.302506	0.537788
	SM SFA/tot	98.0526	1.59147	0.482288	0.482288
	SM MUFA/tot	104.76	1.46819	0.0345438	0.103631
	SM PUFA/tot	95.1298	1.95809	0.172879	0.259318
	SM medium chain (X16-20)/tot	103.2	3.62868	0.590989	0.590989
	SM long chain (X>20)/tot	98.9751	0.975529	0.48571	0.590989
carnitine processed	C3:X	121.704	4.16863	0.0253319	0.3826
	Cx (x>3)	109.043	4.84613	0.41562	0.736242
	C0/C2	88.4151	7.03563	0.197905	0.263874
	Ceven/C2	99.575	5.4174	0.961059	0.961059
	Codd/C3	85.5027	3.81003	0.0521557	0.104311
	C0/(C2+C3)	82.9419	5.54254	0.0424405	0.104311
	CX short (C4-C14)	115.902	4.16436	0.155892	0.3826
	CX medium (C16-C18)	100.358	6.81864	0.978314	0.990585
	CX-OH	127.157	5.35379	0.104018	0.3826
	CX non OH	109.442	5.30335	0.438821	0.755747
	CX-OH/non OH	107.506	6.07826	0.691074	0.973787
	CX DC	113.002	2.73603	0.0662443	0.3826
	CX DC / non DC	99.8945	4.56286	0.990585	0.990585
	CX SFA	101.296	5.62605	0.909108	0.974208
	CX:1	122.548	4.88879	0.111022	0.3826
	CX:2	89.1782	3.3504	0.41388	0.736242
	C4X	102.558	3.05154	0.652336	0.940577
	C5X	100.994	2.76635	0.838323	0.974208
	C6X	111.84	2.82222	0.0679254	0.3826
	C8X	95.9095	9.14877	0.786	0.974208
	C10X	122.217	3.54711	0.160803	0.3826
	C12X	125.212	6.70971	0.105227	0.3826
	C14X	112.959	3.85841	0.0792725	0.3826
	C16X	100.266	7.09008	0.984749	0.990585
	C18X	102.045	5.22771	0.771953	0.974208
	CX short (C4-C14)/C0	117.759	5.84503	0.163494	0.3826
	CX medium (C16-C18)/C0	102.889	7.88336	0.826499	0.974208
	CX-OH/C0	132.786	8.50017	0.0938483	0.3826
	CX non OH/C0	111.633	6.5786	0.367027	0.734053
	CX-OH/non OH/C0	111.989	9.26563	0.570922	0.907619
	CX DC/C0	114.979	5.93297	0.154368	0.3826
	CX DC / non DC / C0	101.725	7.35464	0.882315	0.974208
	CX SFA/C0	103.666	7.06452	0.75605	0.974208
	CX:1/C0	124.392	6.3125	0.115795	0.3826
	CX:2/C0	90.6283	4.13576	0.459822	0.770513
	C4X/C0	104.194	5.47443	0.617134	0.911007
	C5X/C0	102.703	5.39405	0.72663	0.974208
	C6X/C0	114.564	6.43894	0.1339	0.3826
	C7X/C0	127.992	8.00344	0.165502	0.3826
	C8X/C0	97.2229	9.06378	0.852349	0.974208
	C9X/C0	109.526	6.61186	0.408064	0.736242
	C10X/C0	124.206	5.97685	0.165212	0.3826
	C12X/C0	127.114	7.11795	0.0921844	0.3826
	C14X/C0	114.738	6.55563	0.172787	0.3826
	C16X/C0	102.874	8.10533	0.835523	0.974208
	C18X/C0	103.174	6.53996	0.724848	0.974208
	CX short (C4-C14)/Ctot	106.752	2.13645	0.134305	0.3826
	CX medium (C16-C18)/Ctot	91.4576	3.15482	0.134305	0.3826
	CX-OH/Ctot	109.444	5.79641	0.601292	0.911007
	CX non OH/Ctot	100.951	0.580622	0.505788	0.825233
	CX-OH/non OH/Ctot	86.0123	8.73386	0.616541	0.911007
	CX DC/Ctot	101.283	4.08065	0.866131	0.974208
	CX SFA/Ctot	92.0485	1.93005	0.0832468	0.3826
	CX:1/Ctot	114.125	2.38375	0.071685	0.3826
	CX:2/Ctot	80.3972	4.8674	0.105116	0.3826
	C4X/Ctot	90.9631	4.63103	0.346268	0.715621
	C5X/Ctot	89.2213	4.27297	0.254729	0.544593
	C6X/Ctot	100.145	5.20443	0.9869	0.990585
	C7X/Ctot	118.763	4.65634	0.114257	0.3826
	C8X/Ctot	86.8872	5.5048	0.140492	0.3826
	C9X/Ctot	96.0663	7.68219	0.75758	0.974208
	C10X/Ctot	117.221	3.76116	0.118423	0.3826
	C12X/Ctot	115.829	2.76569	0.0756045	0.3826
	C14X/Ctot	100.872	4.47769	0.911355	0.974208
	C16X/Ctot	91.7677	3.49293	0.170033	0.3826
	C18X/Ctot	86.2921	5.66507	0.387562	0.736242
TAG processed and normalized to total	TAG total	127.22	12.3082	0.254552	0.41654
	C48:0/tot	62.2088	11.1881	0.15037	0.367612
	C50:0/tot	78.7923	6.68862	0.230286	0.414514
	C50:1/tot	80.6827	4.53703	0.152003	0.367612
	C50:2/tot	85.7164	4.09756	0.163383	0.367612
	C50:3/tot	89.5617	7.66709	0.34713	0.478431
	C52:0/tot	75.2026	8.28582	0.213463	0.414514
	C52:1/tot	103.198	4.89404	0.756407	0.800902
	C52:2/tot	111.985	5.00364	0.158091	0.367612
	C52:3/tot	110.68	2.55889	0.0505738	0.367612
	C52:4/tot	98.8302	5.75542	0.915654	0.915654
	C52:5/tot	93.2725	6.11728	0.687967	0.773963
	C54:2/tot	76.8008	5.69284	0.0946376	0.367612
	C54:3/tot	91.8685	3.59168	0.527189	0.632627
	C54:4/tot	90.8539	5.14223	0.372113	0.478431
	C54:5/tot	91.1667	5.92485	0.31205	0.468074
	C54:6/tot	76.6432	7.71728	0.0622713	0.367612
	C54:7/tot	72.5057	7.25401	0.0927738	0.367612
	C0/PC total	117.702	13.7182	0.391748	0.615585
	C2/PC total	136.644	14.8262	0.151648	0.615585
	C(2+3)/PC total	120.649	13.2719	0.316001	0.615585
	Cx(X > 3)/PC total	126.393	10.2309	0.189955	0.615585
	C0/TAG total	63.7266	18.133	0.298096	0.615585
	C2/TAG total	75.902	16.7104	0.434531	0.615585
	C(2+3)/TAG total	65.6396	17.7785	0.315015	0.615585
	Cx(X > 3)/TAG total	76.8369	16.856	0.403276	0.615585
	Pcaa x:4/Lyso PC total	87.7793	14.5078	0.57229	0.694924
	Pcaa (x:4/x:5+x:6)/Lyso PC total	114.103	3.65577	0.0982749	0.615585
	Pcaa x:6/lyso PC total	79.9736	14.6396	0.370402	0.615585
	Pcae x:4/Lyso PC total	103.057	4.71077	0.763211	0.768814
	Pcae (x:4/x:5+x:6)/Lyso PC total	105.381	4.25626	0.554218	0.694924
	Pcae x:6/lyso PC total	93.618	4.57819	0.686767	0.768814
	C5-DC-M / C5	103.6	3.0701	0.768814	0.768814
	C5:1 DC / C5:1	135.211	13.6392	0.145894	0.615585
	C12 DC / C12	108.732	7.46275	0.420757	0.615585
	TAG SFA (X:0)	101.492	12.1505	0.948335	0.948335
	TAG PUFA (X:>3)	119.739	11.74	0.417702	0.792787
	TAG X:1	116.303	13.8169	0.528525	0.792787
	TAG X:2	130.75	14.5763	0.26937	0.792787
	TAG X:3	135.088	12.0084	0.171881	0.792787
	TAG X:4	124.083	12.1951	0.340974	0.792787
	TAG X:5	116.502	11.3739	0.474116	0.792787
	TAG X:6	92.4692	8.74952	0.732683	0.922788
	TAG X:7	94.4713	11.0117	0.820256	0.922788
	TAG SFA (X:0) / total TAGs	71.8595	7.45756	0.168372	0.378837
	TAG PUFA (X:>3) / total TAGs	94.8261	5.10865	0.593793	0.763448
	TAG X:1 / total TAGs	88.3461	3.62666	0.312061	0.56171
	TAG X:2 / total TAGs	102.37	3.66459	0.713749	0.802968
	TAG X:3 / total TAGs	108.205	2.23368	0.093495	0.280485
	TAG X:4 / total TAGs	98.1253	5.3675	0.851392	0.851392
	TAG X:5 / total TAGs	92.0585	5.52106	0.382699	0.574049
	TAG X:6 / total TAGs	76.6432	7.71728	0.0622713	0.280485
	TAG X:7 / total TAGs	72.5057	7.25401	0.0927738	0.280485

## Sheet: B) raw data brain
Table S2: raw data of analyzed lipid species, mean, SEM, p value and FDR-corrected p value in brain tissue
	lipid species	mean	SEM	p value	FDR-corrected p value
phosphatidylcholine	PC aa C20:0	87.5624	6.23336	0.170708	0.99263
	PC aa C24:0	98.9005	9.01309	0.964032	0.99263
	PC aa C26:0	114.376	9.57934	0.61645	0.99263
	PC aa C28:0	115.541	8.23801	0.574793	0.99263
	PC aa C28:1	103.391	7.32085	0.868182	0.99263
	PC aa C30:0	100.712	8.59148	0.963733	0.99263
	PC aa C30:2	103.542	7.54907	0.876166	0.99263
	PC aa C32:0	100.468	9.83037	0.97753	0.99263
	PC aa C32:1	98.366	10.4378	0.917511	0.99263
	PC aa C32:2	98.2701	10.8538	0.915288	0.99263
	PC aa C32:3	99.865	7.32065	0.99263	0.99263
	PC aa C34:1	108.639	10.6791	0.599412	0.99263
	PC aa C34:2	107.471	10.1213	0.659039	0.99263
	PC aa C34:3	95.8642	8.64026	0.790869	0.99263
	PC aa C34:4	90.7589	9.81266	0.408245	0.99263
	PC aa C36:0	106.272	10.9155	0.697867	0.99263
	PC aa C36:1	105.414	10.0549	0.737881	0.99263
	PC aa C36:2	103.015	10.6015	0.860557	0.99263
	PC aa C36:3	105.054	10.1599	0.755485	0.99263
	PC aa C36:4	99.6599	8.86847	0.982424	0.99263
	PC aa C36:5	104.843	9.97906	0.738401	0.99263
	PC aa C36:6	114.086	11.4392	0.408064	0.99263
	PC aa C38:0	105.225	11.1362	0.750561	0.99263
	PC aa C38:1	105.22	8.43738	0.741505	0.99263
	PC aa C38:3	102.71	9.19625	0.865079	0.99263
	PC aa C38:4	106.161	9.43279	0.707722	0.99263
	PC aa C38:5	100.843	9.50506	0.957093	0.99263
	PC aa C38:6	103.239	10.2634	0.84975	0.99263
	PC aa C40:0	98.317	8.37972	0.915123	0.99263
	PC aa C40:1	102.055	11.2619	0.911034	0.99263
	PC aa C40:2	103.521	10.6286	0.824739	0.99263
	PC aa C40:3	102.437	11.1948	0.886814	0.99263
	PC aa C40:4	104.05	9.88721	0.795693	0.99263
	PC aa C40:5	112.117	10.2814	0.461577	0.99263
	PC aa C40:6	110.202	8.49369	0.528095	0.99263
	PC aa C42:0	105.368	11.0876	0.769326	0.99263
	PC aa C42:1	109.13	10.8049	0.638167	0.99263
	PC aa C42:2	109.726	11.6812	0.616652	0.99263
	PC aa C42:4	113.392	12.0542	0.477335	0.99263
	PC aa C42:5	97.4791	8.9096	0.867688	0.99263
	PC aa C42:6	107.006	9.45671	0.664241	0.99263
	PC aa C44:0	107.628	10.3671	0.589635	0.99263
	PC aa C48:0	123.652	16.0378	0.314407	0.99263
phosphatidylcholin plasmalogens	PC ae C30:0	99.9555	9.58425	0.99795	0.99795
	PC ae C30:1	106.169	11.6635	0.857936	0.984103
	PC ae C30:2	102.513	17.2546	0.956979	0.99795
	PC ae C32:1	104.836	2.22965	0.208238	0.971647
	PC ae C32:2	91.845	7.68959	0.697593	0.971647
	PC ae C34:0	103.426	3.02214	0.39822	0.971647
	PC ae C34:1	105.876	3.12929	0.139779	0.908564
	PC ae C34:2	103.599	2.79418	0.347048	0.971647
	PC ae C34:3	99.26	10.0927	0.982482	0.99795
	PC ae C36:0	102.132	3.53822	0.787982	0.984103
	PC ae C36:1	102.366	4.12328	0.620706	0.971647
	PC ae C36:2	104.343	3.3457	0.302897	0.971647
	PC ae C36:3	106.923	4.02705	0.187057	0.971647
	PC ae C36:4	96.3118	3.50721	0.523902	0.971647
	PC ae C36:5	110.068	3.77943	0.0908369	0.908564
	PC ae C38:0	96.5745	3.93312	0.549677	0.971647
	PC ae C38:1	102.637	4.43989	0.666807	0.971647
	PC ae C38:2	104.234	3.95017	0.446717	0.971647
	PC ae C38:3	94.6413	3.02869	0.254688	0.971647
	PC ae C38:4	100.705	2.44277	0.8539	0.984103
	PC ae C38:5	102.584	3.38757	0.622883	0.971647
	PC ae C38:6	101.098	3.91887	0.830629	0.984103
	PC ae C40:0	102.807	3.23739	0.555605	0.971647
	PC ae C40:1 / PC aa C40:8	106.837	2.99919	0.316957	0.971647
	PC ae C40:2	100.532	4.7467	0.941586	0.99795
	PC ae C40:3	98.8156	5.19001	0.905188	0.99795
	PC ae C40:4	102.379	5.30264	0.76726	0.984103
	PC ae C40:5	96.4911	3.36274	0.633368	0.971647
	PC ae C40:6	103.589	4.62312	0.553753	0.971647
	PC ae C42:0	117.465	4.61103	0.017236	0.381729
	PC ae C42:1	113.144	2.94165	0.0989693	0.908564
	PC ae C42:2	105.298	2.85186	0.462097	0.971647
	PC ae C42:3	103.325	3.55362	0.654231	0.971647
	PC ae C42:4	88.8492	7.00235	0.295633	0.971647
	PC ae C42:5	95.9859	5.19887	0.687602	0.971647
	PC ae C44:3	106.138	6.01044	0.664738	0.971647
	PC ae C44:4	107.284	2.06666	0.136881	0.908564
	PC ae C44:5	114.964	3.76297	0.0195758	0.381729
	PC ae C44:6	102.906	5.43729	0.767882	0.984103
lyso-phosphatidylcholine	lyso PC 6:X (Lyso PC 06:0 )	121.427	15.9668	0.450499	0.888097
	lyso PC 10:X (Lyso PC 10:0 )	107.005	8.31644	0.574215	0.888097
	lyso PC 12:X (Lyso PC 12:0 )	95.8226	14.6046	0.847729	0.888097
	lyso PC 14:X (Lyso PC 14:0 )	98.3346	7.00526	0.921428	0.921428
	Lyso PC 16:0	109.262	8.98872	0.492299	0.888097
	Lyso PC 16:1	120.157	9.9274	0.190557	0.888097
	lyso PC 17:X (Lyso PC 17:0 )	101.734	6.42815	0.83083	0.888097
	Lyso PC 18:0	113.03	9.08781	0.292469	0.888097
	Lyso PC 18:1	112.095	10.3497	0.387205	0.888097
	lyso PC X:2 (Lyso PC 18:2 )	133.374	13.2248	0.0990476	0.888097
	Lyso PC 18:3	108.836	15.2182	0.698802	0.888097
	Lyso PC 20:0	110.409	7.23508	0.303765	0.888097
	Lyso PC 20:3	111.609	8.18767	0.292585	0.888097
	lyso PC X:4 (Lyso PC 20:4 )	105.576	12.4352	0.745236	0.888097
	lyso PC X:5 (Lyso PC 20:5 )	118.812	10.7095	0.39682	0.888097
	Lyso PC 22:0	109.153	13.4877	0.791028	0.888097
	lyso PC X:6 (Lyso PC 22:6 )	111.051	13.2573	0.542082	0.888097
	lyso PC 24:X (Lyso PC 24:0 )	123.125	10.8474	0.385799	0.888097
	Lyso PC 26:0	111.475	9.07164	0.575212	0.888097
	Lyso PC 26:1	112.461	12.514	0.611778	0.888097
	Lyso PC 28:0	109.03	9.87096	0.705578	0.888097
	Lyso PC 28:1	132.64	15.3962	0.436679	0.888097
sphingomyeline	SM short-chain X<16 (SM C14:1 OH)	130.68	9.55785	0.206862	0.962575
	SM C16:0	107.069	14.0156	0.761355	0.962575
	SM C16:1	124.089	13.2885	0.293636	0.962575
	SM C16:1 OH	97.8021	10.8963	0.918712	0.962575
	SM C18:0	111.491	16.1105	0.665303	0.962575
	SM C18:1	105.973	15.1891	0.817485	0.962575
	SM C20:2	102.714	12.6642	0.901264	0.962575
	SM C22:1 OH	107.752	17.7287	0.78421	0.962575
	SM C22:2 OH	110.717	16.7906	0.725	0.962575
	SM C22:3	115.7	16.1787	0.555494	0.962575
	SM C24:0	110.418	16.3378	0.703153	0.962575
	SM C24:1	111.846	15.2673	0.653937	0.962575
	SM C24:1 OH	108.928	17.0707	0.726905	0.962575
	SM C26:0	116.741	15.4492	0.53478	0.962575
	SM C26:1	101.249	17.1349	0.962575	0.962575
carnitine	C0	122.769	14.4505	0.325469	0.947228
	C02	117.767	9.94598	0.273111	0.947228
	C03	121.837	11.8711	0.26993	0.947228
	C03 OH	100.893	9.3338	0.939992	0.947228
	C03:1	115.311	12.3373	0.393818	0.947228
	C04	120.224	11.7789	0.234905	0.947228
	C04 OH / C3-DC	116.306	14.7796	0.43722	0.947228
	C04:1	101.67	5.2085	0.849278	0.947228
	C05	112.247	9.27746	0.373642	0.947228
	C05 M DC	104.431	3.00836	0.451518	0.947228
	C05 OH / C3-DC-M	137.35	12.2387	0.0614039	0.947228
	C05:1	103.511	6.15311	0.769508	0.947228
	C05:1 DC	119.713	13.1983	0.246019	0.947228
	C06 / C4:1-DC	102.778	12.4034	0.866204	0.947228
	C06 OH / C5-DC	105.445	16.3039	0.799352	0.947228
	C06:1	114.848	10.7087	0.337546	0.947228
	C7X (C07 DC)	96.3693	16.4875	0.874188	0.947228
	C08	111.593	18.4447	0.709682	0.947228
	C08:1	98.8565	9.54706	0.934775	0.947228
	C9X (C09)	96.756	13.1253	0.851829	0.947228
	C10	103.787	3.97761	0.547384	0.947228
	C10:1	97.7159	17.5884	0.927288	0.947228
	C10:2	114.555	14.043	0.430834	0.947228
	C12	95.7224	11.8893	0.775158	0.947228
	C12 DC	86.3232	13.7003	0.723215	0.947228
	C12:1	97.4915	15.6942	0.906792	0.947228
	C14	110.06	8.56651	0.512461	0.947228
	C14:1	98.2484	8.17425	0.897319	0.947228
	C14:1 OH	109.452	12.7874	0.606146	0.947228
	C14:2	98.0591	11.5775	0.895672	0.947228
	C14:2 OH	89.0562	11.3418	0.415444	0.947228
	C16	119.125	10.1133	0.318806	0.947228
	C16 OH	82.5753	4.97057	0.351469	0.947228
	C16:1	101.179	10.963	0.937012	0.947228
	C16:1 OH	100.862	6.61415	0.947228	0.947228
	C16:2	124.469	8.18692	0.144036	0.947228
	C16:2 OH	92.6361	13.7936	0.640671	0.947228
	C18:0	122.2	9.35589	0.140704	0.947228
	C18:1	117.03	8.96541	0.198138	0.947228
	C18:1 OH	88.6246	8.46105	0.427283	0.947228
	C18:2	112.844	12.6347	0.471978	0.947228
triacylglycerides	C48:0	117.887	23.7798	0.572622	0.682911
	C50:0	106.608	15.9132	0.756683	0.756683
	C50:1	143.157	30.5676	0.376201	0.682911
	C50:2	127.712	25.4412	0.540336	0.682911
	C50:3	192.145	20.1464	0.0844729	0.618816
	C52:0	86.335	27.4613	0.656245	0.697261
	C52:1	132.992	32.0502	0.490729	0.682911
	C52:2	144.52	21.4293	0.243477	0.618816
	C52:3	164.121	25.2917	0.162328	0.618816
	C52:4	180.526	35.4822	0.241652	0.618816
	C52:5	142.144	18.2346	0.291207	0.618816
	C54:2	182.337	36.987	0.265092	0.618816
	C54:3	114.714	20.2111	0.602569	0.682911
	C54:4	130.89	12.7061	0.249967	0.618816
	C54:5	125.101	20.4155	0.443848	0.682911
	C54:6	155.075	26.8849	0.2498	0.618816
	C54:7	172.456	42.7328	0.4043	0.682911
PCaa processed and normalized to total	Pcaa total	104.876	9.92837	0.760731	0.990496
	PC aa C20:0/tot	84.9119	16.0075	0.421799	0.990496
	PC aa C24:0/tot	90.5881	18.5506	0.802713	0.990496
	PC aa C26:0/tot	101.412	17.8599	0.973065	0.990496
	PC aa C28:0/tot	100.475	14.2392	0.990496	0.990496
	PC aa C28:1/tot	95.6454	15.6911	0.892766	0.990496
	PC aa C30:0/tot	97.7656	2.03255	0.449104	0.990496
	PC aa C30:2/tot	93.1523	11.909	0.838384	0.990496
	PC aa C32:0/tot	96.5109	1.45479	0.167926	0.990496
	PC aa C32:1/tot	93.6532	3.0194	0.09866	0.990496
	PC aa C32:2/tot	93.5618	2.86252	0.0706307	0.990496
	PC aa C32:3/tot	88.2439	7.42279	0.614015	0.990496
	PC aa C34:1/tot	102.549	1.05655	0.2744	0.990496
	PC aa C34:2/tot	102.555	1.25143	0.309571	0.990496
	PC aa C34:3/tot	91.9614	3.23674	0.230878	0.990496
	PC aa C34:4/tot	84.7459	8.45231	0.160515	0.990496
	PC aa C36:0/tot	100.246	2.14311	0.950809	0.990496
	PC aa C36:1/tot	100.638	2.14411	0.86341	0.990496
	PC aa C36:2/tot	98.4463	1.93831	0.515756	0.990496
	PC aa C36:3/tot	99.8774	2.21887	0.965053	0.990496
	PC aa C36:4/tot	96.2519	3.39866	0.35741	0.990496
	PC aa C36:5/tot	96.8546	3.79569	0.730565	0.990496
	PC aa C36:6/tot	106.333	7.87757	0.613468	0.990496
	PC aa C38:0/tot	99.1448	3.67906	0.856907	0.990496
	PC aa C38:1/tot	102.271	3.20207	0.571337	0.990496
	PC aa C38:3/tot	98.6965	1.75245	0.663862	0.990496
	PC aa C38:4 /tot	102.551	1.68991	0.359037	0.990496
	PC aa C38:5 Tot	96.1321	1.55375	0.354768	0.990496
	PC aa C38:6 /tot	98.9089	0.946439	0.6881	0.990496
	PC aa C40:0 /tot	96.0165	3.87363	0.411609	0.990496
	PC aa C40:1 /tot	97.5062	2.85612	0.564865	0.990496
	PC aa C40:2 /tot	97.5584	3.13134	0.590242	0.990496
	PC aa C40:3 /tot	97.2271	3.03601	0.542956	0.990496
	PC aa C40:4 /tot	98.8804	3.20566	0.800868	0.990496
	PC aa C40:5 /tot	105.385	1.49684	0.1632	0.990496
	PC aa C40:6 /tot	106.534	2.65016	0.111998	0.990496
	PC aa C42:0 /tot	100.717	4.70209	0.905159	0.990496
	PC aa C42:1 /tot	105.64	2.78452	0.380267	0.990496
	PC aa C42:2 /tot	104.789	3.70784	0.344002	0.990496
	PC aa C42:4 /tot	106.598	3.59768	0.1835	0.990496
	PC aa C42:5 /tot	93.3835	2.93674	0.321203	0.990496
	PC aa C42:6 /tot	102.881	5.19721	0.732283	0.990496
	PC aa C44:0 /tot	97.1092	6.56605	0.849375	0.990496
	PC aa C48:0 /tot	110.955	11.9626	0.576228	0.990496
	PC aa X:0 (PC aa SFA )	101.081	9.69229	0.946757	0.946757
	PC aa X:1 (PC aa MUFA )	107.022	10.3871	0.663726	0.918229
	PC aa PUFA	104.196	9.39844	0.794142	0.918229
	PC aa SFA/MUFA	95.3073	2.14328	0.24306	0.918229
	PC aa SFA/PUFA	96.7997	1.84249	0.296207	0.918229
	PC aa MUFA /PUFA	101.236	1.26087	0.681645	0.918229
	PC aa X:2	104.084	10.4191	0.809242	0.918229
	PC aa X:3	103.68	9.61282	0.816519	0.918229
	PC aa X:4	103.02	8.9449	0.847596	0.918229
	PC aa X:5	103.513	9.63318	0.822166	0.918229
	PC aa X:6	106.082	9.41754	0.713348	0.918229
	PC aaX:4/X:6	97.4094	1.97747	0.344716	0.918229
	PC aaX:4/(X5+X6)	98.3824	1.98759	0.569473	0.918229
	PC aa short (<32:X)	105.635	6.10588	0.684863	0.96882
	PC aa medium (32-36:X)	104.731	10.1309	0.768963	0.96882
	PC aa long (>36:X)	105.402	9.38874	0.739461	0.96882
	PC aa <30:X	111.054	8.30006	0.662857	0.96882
	PC aa 30:X	100.824	8.36471	0.956594	0.993154
	PC aa 32:X	100.141	9.88947	0.993154	0.993154
	PC aa 34:X	108.549	10.6497	0.60281	0.96882
	PC aa 36:X	103.877	9.77848	0.80735	0.96882
	PC aa 38:X	104.01	9.55531	0.806033	0.96882
	PC aa 40:X	108.844	8.98301	0.581922	0.96882
	PC aa 42:X	108.176	10.5635	0.650524	0.96882
	PC aa >42:X	109.381	10.4818	0.50355	0.96882
	PC aa X:0/tot (PC aa SFA/tot )	96.8602	1.50214	0.227972	0.942098
	PC aa X:1/tot (PC aa MUFA/tot )	101.436	0.696963	0.366613	0.942098
	PC aa PUFA/tot	99.9913	0.776728	0.996012	0.996012
	PC aa X:2/tot	99.3299	1.42555	0.723045	0.942098
	PC aa X:3/tot	98.9858	1.33595	0.656441	0.942098
	PC aa X:4/tot	99.3969	1.74296	0.824336	0.942098
	PC aa X:5/tot	98.2594	1.09527	0.647948	0.942098
	PC aa X:6/tot	102.015	1.15017	0.384985	0.942098
	PC aa short (<32:X)/tot	98.2418	8.69828	0.929969	0.984469
	PC aa medium (32-36:X)/tot	99.6963	0.293545	0.603384	0.984469
	PC aa long (>36:X)/tot	101.255	0.793544	0.498457	0.984469
	PC aa <30:X/tot	98.9039	16.1189	0.977036	0.984469
	PC aa 30:X/tot	97.5606	2.11844	0.424642	0.984469
	PC aa 32:X/tot	96.0575	1.5702	0.10127	0.759385
	PC aa 34:X/tot	102.503	1.02785	0.266633	0.984469
	PC aa 36:X/tot	99.3132	1.73103	0.79812	0.984469
	PC aa 38:X/tot	99.9586	0.800026	0.984469	0.984469
	PC aa 40:X/tot	104.464	1.66042	0.126564	0.759385
	PC aa 42:X/tot	103.817	2.44679	0.360829	0.984469
	PC aa >42:X/tot	98.6148	6.44545	0.924731	0.984469
Pcae processed and normalized to total	Pcae total	104.085	2.5902	0.286431	0.988012
	PC ae C30:0/tot	98.114	10.4736	0.905144	0.988012
	PC ae C30:1/tot	106.082	12.5259	0.84862	0.988012
	PC ae C30:2/tot	103.955	18.1642	0.928678	0.988012
	PC ae C32:1/tot	100.763	1.24602	0.746127	0.988012
	PC ae C32:2/tot	89.9779	7.40307	0.581602	0.988012
	PC ae C34:0/tot	99.2533	1.82741	0.781676	0.988012
	PC ae C34:1/tot	101.242	1.45075	0.710016	0.988012
	PC ae C34:2/tot	99.1384	1.81213	0.83057	0.988012
	PC ae C34:3/tot	99.5348	10.9462	0.988012	0.988012
	PC ae C36:0/tot	98.3872	2.42134	0.790786	0.988012
	PC ae C36:1/tot	97.8741	1.97293	0.487253	0.988012
	PC ae C36:2/tot	99.9131	1.91554	0.978732	0.988012
	PC ae C36:3/tot	102.302	2.58406	0.586007	0.988012
	PC ae C36:4/tot	92.6666	2.46365	0.0819391	0.63052
	PC ae C36:5/tot	105.911	2.93409	0.127313	0.636564
	PC ae C38:0/tot	92.6143	2.22816	0.0989395	0.63052
	PC ae C38:1/tot	98.4865	2.55463	0.685693	0.988012
	PC ae C38:2/tot	100.138	2.48499	0.964909	0.988012
	PC ae C38:3/tot	91.0348	2.41051	0.0160912	0.321824
	PC ae C38:4/tot	96.7628	1.83627	0.295044	0.988012
	PC ae C38:5/tot	98.6666	1.71091	0.573862	0.988012
	PC ae C38:6/tot	97.0679	2.43326	0.315923	0.988012
	PC ae C40:0/tot	98.6559	1.39267	0.635612	0.988012
	PC ae C40:1 / PC aa C40:8/tot	103.497	3.72229	0.523704	0.988012
	PC ae C40:2/tot	96.6851	3.26456	0.516283	0.988012
	PC ae C40:3 / PC aa C40:10 /tot	95.1499	3.72546	0.533743	0.988012
	PC ae C40:4 /tot	98.668	4.56696	0.83112	0.988012
	PC ae C40:5 /tot	93.3041	3.06159	0.237289	0.988012
	PC ae C40:6 /tot	99.4747	3.69335	0.906839	0.988012
	PC ae C42:0 /tot	112.578	2.60707	0.00452852	0.181141
	PC ae C42:1 /tot	109.502	2.97371	0.110341	0.63052
	PC ae C42:2 /tot	102.132	4.10083	0.731308	0.988012
	PC ae C42:3 /tot	100.145	3.75835	0.979005	0.988012
	PC ae C42:4 /tot	85.2566	4.89073	0.0777515	0.63052
	PC ae C42:5 /tot	92.401	3.33036	0.328383	0.988012
	PC ae C44:3/tot	103.13	5.45056	0.785778	0.988012
	PC ae C44:4/tot	103.962	4.11676	0.431715	0.988012
	PC ae C44:5 / PC aa C44:12/ tot	110.719	3.73035	0.0453054	0.604072
	PC ae C44:6/tot	99.2935	4.82967	0.930408	0.988012
	PC ae X:0 (PC ae SFA )	103.589	2.96912	0.379694	0.811066
	PC ae X:1 (PC ae MUFA )	105.282	2.76334	0.143729	0.622826
	PC ae PUFA	103.344	2.24627	0.469474	0.811066
	PC ae SFA/MUFA	98.4478	1.24267	0.404333	0.811066
	PC ae SFA/PUFA	99.7386	1.51328	0.922945	0.990325
	PC ae MUFA /PUFA	101.247	1.0333	0.618377	0.811066
	PC ae X:2	103.566	2.30623	0.38568	0.811066
	PC ae X:3	102.241	2.87479	0.773024	0.913574
	PC ae X:4	99.9448	2.41377	0.990325	0.990325
	PC ae X:5	107.524	2.57201	0.12461	0.622826
	PC ae X:6	102.18	3.18433	0.623897	0.811066
	PC aeX:4/X:6	98.081	1.93409	0.544157	0.811066
	PC aeX:4/(X5+X6)	94.8683	1.79757	0.0864114	0.622826
	PC ae 30:X (PC ae short (<32:X) )	102.397	11.8115	0.933248	0.933248
	PC ae medium (32-36:X)	103.99	2.88478	0.250827	0.627068
	PC ae long (>36:X)	104.183	2.56494	0.333678	0.640859
	PC ae 32:X	103.706	2.39969	0.451651	0.640859
	PC ae 34:X	104.825	2.74855	0.150552	0.50184
	PC ae 36:X	102.871	3.36663	0.490391	0.640859
	PC ae 38:X	100.811	3.232	0.853012	0.933248
	PC ae 40:X	102.867	2.8805	0.512687	0.640859
	PC ae 42:X	109.109	2.55712	0.147063	0.50184
	PC ae >42:X	111.482	2.31518	0.040885	0.40885
	PC ae X:0/tot (PC ae SFA/tot )	99.4446	0.817946	0.653563	0.846093
	PC ae X:1/tot (PC ae MUFA/tot )	100.986	0.575734	0.406432	0.812864
	PC ae PUFA/tot	99.5614	0.793735	0.803625	0.846093
	PC ae X:2/tot	99.6493	0.935264	0.819116	0.846093
	PC ae X:3/tot	98.9612	2.40042	0.846093	0.846093
	PC ae X:4/tot	96.2402	1.5289	0.16406	0.656239
	PC ae X:5/tot	103.577	1.55317	0.128606	0.656239
	PC ae X:6/tot	98.1337	1.22887	0.259326	0.691537
	PC ae 30:X/tot (PC ae short (<32:X)/tot )	101.787	12.6708	0.945827	0.957252
	PC ae medium (32-36:X)/tot	99.6661	0.794498	0.834225	0.957252
	PC ae long (>36:X)/tot	100.23	0.567532	0.818067	0.957252
	PC ae 32:X/tot	99.8431	1.3825	0.957252	0.957252
	PC ae 34:X/tot	100.417	1.05511	0.855578	0.957252
	PC ae 36:X/tot	98.5812	1.08765	0.450553	0.957252
	PC ae 38:X/tot	96.8053	1.21669	0.0468379	0.23419
	PC ae 40:X/tot	98.8619	1.11929	0.542486	0.957252
	PC ae 42:X/tot	105.336	1.76551	0.147193	0.490642
	PC ae >42:X/tot	107.668	2.40636	0.0427966	0.23419
	Pcae total/aa	98.7856	12.9177	0.94546	0.963622
	PC ae X:0 /aa (PC ae SFA/aa )	101.862	13.4159	0.916537	0.963622
	PC ae X:1/aa (PC ae MUFA/aa )	99.0392	13.3372	0.957326	0.963622
	PC ae PUFA/aa	96.7439	11.9431	0.855759	0.963622
	PC ae SFA/MUFA /aa	102.96	2.6335	0.495584	0.963622
	PC ae SFA/PUFA /aa	102.71	2.78666	0.595729	0.963622
	PC ae MUFA /PUFA /aa	99.7784	1.55292	0.945431	0.963622
	PC ae X:2 /aa	98.8617	13.5878	0.952507	0.963622
	PC ae X:3 /aa	97.5787	13.3663	0.905727	0.963622
	PC ae X:4 /aa	93.3757	10.6978	0.693154	0.963622
	PC ae X:5 /aa	102.823	11.0205	0.862194	0.963622
	PC ae X:6 /aa	93.6019	12.1179	0.713232	0.963622
	PC ae short (<32:X) /aa	102.655	15.5127	0.907446	0.963622
	PC ae medium (32-36:X) /aa	99.2167	12.728	0.963622	0.963622
	PC ae long (>36:X) /aa	96.9546	12.4208	0.862009	0.963622
	PC ae 30:X (PC ae short-chain < 32:X) /aa	96.0645	22.8913	0.925002	0.963622
	PC ae 32:X /aa	102.031	13.6849	0.91672	0.963622
	PC ae 34:X /aa	97.6838	13.0509	0.892726	0.963622
	PC ae 36:X /aa	97.7429	12.6306	0.898677	0.963622
	PC ae 38:X /aa	94.4178	12.4133	0.750362	0.963622
	PC ae 40:X /aa	93.5767	12.8382	0.70083	0.963622
	PC ae 42:X /aa	98.6258	13.9568	0.948415	0.963622
	PC ae >42:X /aa	104.719	8.70924	0.707359	0.963622
PCax	PC ax tot	104.601	6.53189	0.654683	0.997777
	PC ax X:0 (PC ax SFA )	102.239	5.14274	0.792125	0.848625
	PC ax X:1 (PC ax MUFA )	106.553	7.65106	0.576465	0.829836
	PC ax PUFA	103.892	6.15492	0.702169	0.829836
	PC ax SFA/MUFA	96.4188	3.24523	0.437543	0.829836
	PC ax SFA/PUFA	98.4802	1.76121	0.504544	0.829836
	PC ax MUFA /PUFA	101.938	1.74018	0.565155	0.829836
	PC ax X:2	103.828	5.33084	0.648128	0.829836
	PC ax X:3	102.812	3.36125	0.664311	0.829836
	PC ax X:4	102.391	7.37182	0.848625	0.848625
	PC ax X:5	105.56	5.2454	0.497314	0.829836
	PC ax X:6	105.313	7.68073	0.686709	0.829836
	PC axX:4/X:6	97.3161	1.39916	0.246437	0.829836
	PC axX:4/(X5+X6)	97.5219	1.37301	0.395886	0.829836
	PC ax short (<32:X) (PC aa <32:X PC ae 30:X)	104.501	4.97574	0.779895	0.958689
	PC ax medium (32-36:X)	104.564	7.9649	0.714883	0.958689
	PC ax long (>36:X)	104.678	3.94246	0.478024	0.958689
	PC ax 30:X (PC aa 30:X PC ae short-chain < C32:X)	101.618	3.55271	0.894649	0.980766
	PC ax 32:X	100.367	9.16093	0.980766	0.980766
	PC ax 34:X	107.531	8.01883	0.53296	0.958689
	PC ax 36:X	103.593	7.20171	0.753142	0.958689
	PC ax 38:X	102.989	6.67141	0.784382	0.958689
	PC ax 40:X	104.397	2.82931	0.351175	0.958689
	PC ax 42:X	109.009	2.17348	0.101577	0.558674
	PC ax >42:X	111.473	2.33558	0.0411644	0.452809
	PC ax X:0/tot (PC ax SFA/tot )	98.0162	1.87049	0.421238	0.912263
	PC ax X:1/tot (PC ax MUFA/tot )	101.597	1.31384	0.45852	0.912263
	PC ax PUFA/tot	99.4828	0.597426	0.722602	0.912263
	PC ax X:2/tot	99.1718	1.6068	0.753527	0.912263
	PC ax X:3/tot	98.0978	4.12565	0.800742	0.912263
	PC ax X:4/tot	98.4412	1.50694	0.605996	0.912263
	PC ax X:5/tot	100.428	1.56564	0.912263	0.912263
	PC ax X:6/tot	101.175	1.97922	0.725643	0.912263
	PC ax short (<32:X)/tot	99.329	10.1457	0.975791	0.985239
	PC ax medium (32-36:X)/tot	99.9518	1.74793	0.985239	0.985239
	PC ax long (>36:X)/tot	100.114	3.27596	0.980902	0.985239
	PC ax 30:X/tot	97.3159	9.48208	0.882679	0.985239
	PC ax 32:X/tot	96.648	3.54644	0.531166	0.985239
	PC ax 34:X/tot	102.296	1.83051	0.414083	0.985239
	PC ax 36:X/tot	99.1277	1.32366	0.697231	0.985239
	PC ax 38:X/tot	98.7106	0.537329	0.36659	0.985239
	PC ax 40:X/tot	99.7774	5.08034	0.975225	0.985239
	PC ax 42:X/tot	104.014	7.11619	0.723668	0.985239
	PC ax >42:X/tot	105.361	6.1894	0.637592	0.985239
	PC ax C30:0	100.459	3.3163	0.95464	0.997777
	PC ax C30:2	102.663	14.93	0.949899	0.997777
	PC ax C32:1	100.292	6.92807	0.978	0.997777
	PC ax C32:2	95.799	4.88015	0.647717	0.997777
	PC ax C34:1	108.122	8.85387	0.548406	0.997777
	PC ax C34:2	105.487	5.44888	0.518317	0.997777
	PC ax C34:3	98.5953	7.01986	0.957651	0.997777
	PC ax C36:0	104.267	5.73774	0.584104	0.997777
	PC ax C36:1	104.568	7.54064	0.701359	0.997777
	PC ax C36:2	103.39	7.93828	0.790312	0.997777
	PC ax C36:3	105.621	7.26355	0.623664	0.997777
	PC ax C36:4	99.2469	7.86316	0.954928	0.997777
	PC ax C36:5	109.34	3.14063	0.075334	0.803563
	PC ax C38:0	97.7941	3.97276	0.65829	0.997777
	PC ax C38:1	103.642	4.70137	0.606191	0.997777
	PC ax C38:3	99.9705	6.70501	0.997777	0.997777
	PC ax C38:4	105.341	8.2129	0.70515	0.997777
	PC ax C38:5	101.239	7.15002	0.91763	0.997777
	PC ax C38:6	102.838	8.27854	0.834391	0.997777
	PC ax C40:0	102.774	3.19878	0.555486	0.997777
	PC ax C40:1 / PC aa C40:8	105.992	1.98389	0.248123	0.997777
	PC ax C40:2	101.527	4.97826	0.825321	0.997777
	PC ax C40:3 / PC aa C40:10	99.6104	4.45631	0.962212	0.997777
	PC ax C40:4	103.15	6.63568	0.743476	0.997777
	PC ax C40:5	105.786	6.95621	0.544282	0.997777
	PC ax C40:6	108.889	7.13541	0.499359	0.997777
	PC ax C42:0	117.063	4.51295	0.0166466	0.53269
	PC ax C42:1	112.518	2.31122	0.0634431	0.803563
	PC ax C42:2	106.026	1.99529	0.309756	0.997777
	PC ax C42:4	93.9801	6.50881	0.490353	0.997777
	PC ax C42:5	96.2791	3.96298	0.615943	0.997777
	PC ae/aa C30:0	94.8582	21.0893	0.875028	0.975266
	PC ae/aa C30:2	114.443	17.8712	0.612093	0.975266
	PC ae/aa C32:1	106.745	12.802	0.714548	0.975266
	PC ae/aa C32:2	92.1202	19.1953	0.817931	0.975266
	PC ae/aa C34:1	99.1638	13.0591	0.960231	0.975266
	PC ae/aa C34:2	95.315	12.1054	0.782123	0.975266
	PC ae/aa C34:3	103.576	19.888	0.93056	0.975266
	PC ae/aa C36:0	94.3514	13.1489	0.801452	0.975266
	PC ae/aa C36:1	96.5974	12.9886	0.843129	0.975266
	PC ae/aa C36:2	100.947	12.6461	0.956036	0.975266
	PC ae/aa C36:3	102.08	12.0127	0.898686	0.975266
	PC ae/aa C36:4	92.7861	12.1319	0.697407	0.975266
	PC ae/aa C36:5	109.964	15.8624	0.631563	0.975266
	PC ae/aa C38:0	93.1231	14.5507	0.712499	0.975266
	PC ae/aa C38:1	93.0183	10.8612	0.674345	0.975266
	PC ae/aa C38:3	89.1976	10.3387	0.488433	0.975266
	PC ae/aa C38:4	91.9164	10.4033	0.601995	0.975266
	PC ae/aa C38:5	101.645	13.1418	0.926234	0.975266
	PC ae/aa C38:6	95.8396	13.9325	0.830911	0.975266
	PC ae/aa C40:0	100.504	11.0725	0.975266	0.975266
	PC ae/aa C40:1	104.285	16.105	0.853614	0.975266
	PC ae/aa C40:2	98.6054	15.3715	0.946458	0.975266
	PC ae/aa C40:3	96.8952	15.5198	0.890292	0.975266
	PC ae/aa C40:4	97.201	10.2062	0.861584	0.975266
	PC ae/aa C40:5	85.9093	12.2975	0.413968	0.975266
	PC ae/aa C40:6	90.8667	10.5445	0.547424	0.975266
	PC ae/aa C42:0	111.557	13.4187	0.549059	0.975266
	PC ae/aa C42:1	96.6763	13.7859	0.894789	0.975266
	PC ae/aa C42:2	97.0096	17.3905	0.900118	0.975266
	PC ae/aa C42:4	79.1173	16.5397	0.339494	0.975266
	PC ae/aa C42:5	94.5455	12.9987	0.789073	0.975266
lyso-PC processed and normalized to total	total Lyso PC	112.405	8.74714	0.321407	0.975044
	lyso PC X:0 (lyso PC SFA )	112.319	8.71882	0.351549	0.746126
	lyso PC X:1 (lyso PC MUFA )	113.66	9.44098	0.270568	0.746126
	lyso PC PUFA	110.534	12.175	0.522688	0.784033
	lyso PC SFA/MUFA	99.7317	6.03691	0.976672	0.976672
	lyso PC SFA/PUFA	102.742	7.63031	0.817716	0.976672
	lyso PC MUFA /PUFA	101.57	4.08913	0.875471	0.976672
	lyso PC X:3	111.31	7.75707	0.263938	0.746126
	lyso PCX:4/X:6	96.6375	2.5801	0.378501	0.746126
	lyso PCX:4/(X5+X6)	96.4921	2.45023	0.414515	0.746126
	lyso PC short (<16:X)	119.174	15.1832	0.469795	0.606534
	lyso PC medium (16-20X)	110.61	9.12766	0.406181	0.606534
	lyso PC long (>20:X)	113.98	10.3898	0.494479	0.606534
	lyso PC 16:X	109.487	8.9479	0.480786	0.606534
	lyso PC 18:X	113.031	9.70991	0.315769	0.606534
	lyso PC 20:X	107.248	10.4954	0.606534	0.606534
	lyso PC 22:X	110.36	11.3463	0.522372	0.606534
	lyso PC 26:X	111.937	10.4855	0.585861	0.606534
	lyso PC 28:X	120.268	12.4233	0.52959	0.606534
	lyso PC X:0 /total (lyso PC SFA /total )	100.439	1.61016	0.857058	0.988729
	lyso PC X:1/total (lyso PC MUFA/total )	100.091	3.92197	0.988729	0.988729
	lyso PC PUFA/total	96.4534	5.52444	0.69411	0.988729
	Lyso PC 18:2/total (lyso PC X:2/total )	113.836	6.00688	0.216691	0.988729
	lyso PC X:3/total	100.246	9.2183	0.983434	0.988729
	Lyso PC 20:4/total (lyso PC X:4/total )	92.4888	6.39491	0.485688	0.988729
	Lyso PC 20:5/total (lyso PC X:5/total )	102.291	7.51358	0.915779	0.988729
	Lyso PC 22:6/total (lyso PC X:6/total )	96.3896	6.01294	0.700727	0.988729
	lyso PCX:4/X:6/total	89.7929	12.1662	0.443072	0.988729
	lyso PCX:4/(X5+X6)/total	89.6662	12.0588	0.439238	0.988729
	lyso PC short (<16:X)/total	107.745	11.4599	0.660715	0.967546
	lyso PC medium (16-20X)/total	98.045	1.47482	0.538618	0.967546
	lyso PC long (>20:X)/total	101.628	11.588	0.941766	0.967546
	Lyso PC 06:0/total (lyso PC 6:X/total )	109.716	12.457	0.618208	0.975044
	Lyso PC 10:0/total (lyso PC 10:X/total )	97.3202	7.15623	0.76284	0.975044
	Lyso PC 12:0/total (lyso PC 12:X/total )	85.2846	11.7396	0.426632	0.975044
	Lyso PC 14:0/total (lyso PC 14:X/total )	93.185	10.714	0.684779	0.975044
	lyso PC 16:X/total	97.6553	1.9674	0.604758	0.967546
	Lyso PC 17:0/total (lyso PC 17:X/total )	91.8339	7.84473	0.413499	0.975044
	lyso 18:X/total	99.4899	2.0042	0.871633	0.967546
	lyso 20:X/total	94.3434	4.89952	0.50372	0.967546
	lyso 22:X/total	97.0598	7.83654	0.828111	0.967546
	Lyso PC 24:0/total (lyso 24:X/total )	111.887	15.2205	0.698276	0.975044
	lyso 26:X/total	101.041	14.4624	0.967546	0.967546
	lyso 28:X/total	106.286	14.8485	0.856985	0.967546
	Lyso PC 16:0/total	97.4398	2.06057	0.579707	0.975044
	Lyso PC 16:1/total	107.893	6.38761	0.336701	0.975044
	Lyso PC 18:0/total	100.185	2.11202	0.939504	0.975044
	Lyso PC 18:1/total	98.245	3.05102	0.745452	0.975044
	Lyso PC 18:3/total	96.6434	15.2941	0.879279	0.975044
	Lyso PC 20:0/total	97.1798	4.91584	0.767789	0.975044
	Lyso PC 20:3/total	100.677	10.0414	0.958684	0.975044
	Lyso PC 22:0/total	98.1781	18.4985	0.96235	0.975044
	Lyso PC 26:0/total	101.182	12.5426	0.960223	0.975044
	Lyso PC 26:1/total	100.886	16.8071	0.975044	0.975044
	Lyso PC 28:0/total	96.3809	11.7237	0.891149	0.975044
	Lyso PC 28:1/total	117.097	18.0805	0.701116	0.975044
	total Lyso PC/total Pcaa	105.786	7.05027	0.55818	0.946681
	lyso PC SFA/Pcaa SFA	109.623	6.3846	0.289491	0.946681
	lyso PC MUFA/Pcaa MUFA	104.401	10.282	0.780033	0.946681
	lyso PC PUFA/Pcaa PUFA	104.154	10.8058	0.759735	0.946681
	lyso PC X:4 (20:4)/Pcaa X:4	100.889	10.4196	0.946681	0.946681
	lyso PC X:5 (C20:5)/Pcaa X:5	106.024	8.63266	0.80813	0.946681
	lyso PC X:6 (22:6)/Pcaa X:6	102.118	11.6696	0.881388	0.946681
	lyso PCX:4/X:6 (20:4/22:6) /Pcaa X:4/X:6	99.3211	3.53646	0.888037	0.946681
	lyso PCX:4/(X5+X6)/Pcaa X:4(X5+X6)	98.3423	3.49259	0.729813	0.946681
	lyso PC short (<16:X)/Pcaa short (<16:X)	105.442	12	0.777141	0.946681
	lyso PC medium (16-20X)/Pcaa medium (16-20X)	104.979	7.60681	0.599589	0.946681
	lyso PC long (>20:X)/Pcaa long (>20:X)	102.3	15.2878	0.940627	0.946681
SM processed and normalized to total	total SM	111.302	15.5139	0.665236	0.920962
	SM non OH	111.4	15.5059	0.662508	0.754994
	SM OH	108.19	15.8747	0.754994	0.754994
	SM OH/non OH	96.9338	2.20967	0.358648	0.754994
	SM SFA	111.279	15.904	0.669194	0.860936
	SM MUFA	110.206	15.237	0.695378	0.860936
	SM PUFA	115.002	16.1044	0.57409	0.860936
	SM SFA/MUFA	100.836	3.9852	0.860936	0.860936
	SM SFA/PUFA	98.5423	4.88411	0.802141	0.860936
	SM MUFA/PUFA	97.5507	2.87236	0.520319	0.860936
	SM medium chain (X16-20)	110.816	15.7916	0.67942	0.67942
	Sm long chain (X>20)	111.995	15.5809	0.651236	0.67942
	total SM/Pcaa	107.121	7.75378	0.537359	0.67151
	SM SFA /PCaa SFA	110.71	8.16789	0.372798	0.67151
	SM MUFA /PCaa MUFA	104.988	8.5104	0.690703	0.690703
	SM PUFA/ PCaa PUFA	110.286	9.81693	0.455465	0.67151
	SM/PCaa short chain	123.68	6.94006	0.134233	0.67151
	SM/PCaa medium chain (X16-20)	106.65	7.41914	0.556564	0.67151
	SM/PCaa long chain	107.213	9.34761	0.57558	0.67151
	SM short chain (X<16)/tot (SM C14:1 OH/tot )	107.814	15.4923	0.832283	0.920962
	SM C16:0/tot	96.4484	3.81387	0.528443	0.920962
	SM C16:1/tot	105.595	9.74924	0.808983	0.920962
	SM C16:1 OH/tot	91.4759	5.74726	0.237476	0.920962
	SM C18:0/tot	100.052	2.13025	0.984425	0.984425
	SM C18:1/tot	96.9968	2.53231	0.493323	0.920962
	SM C20:2/tot	92.4099	5.37155	0.377435	0.920962
	SM C22:1 OH/tot	96.2485	2.97949	0.360919	0.920962
	SM C22:2 OH/tot	101.678	2.68217	0.757111	0.920962
	SM C22:3/tot	102.714	4.73617	0.637819	0.920962
	SM C24:0/tot	99.247	3.10603	0.863402	0.920962
	SM C24:1/tot	100.929	3.13704	0.812756	0.920962
	SM C24:1 OH/tot	95.4912	5.81605	0.499781	0.920962
	SM C26:0/tot	105.096	4.06536	0.34789	0.920962
	SM C26:1/tot	89.5818	3.20295	0.0179546	0.287273
	SM SFA/tot	99.9053	1.41751	0.954743	0.954743
	SM MUFA/tot	99.5066	2.59309	0.876025	0.954743
	SM PUFA/tot	102.372	4.45084	0.655009	0.954743
	SM medium chain (X16-20)/tot	99.6111	1.79271	0.861126	0.867414
	SM long chain (X>20)/tot	100.571	2.70892	0.867414	0.867414
carnitine processed	C3:X	115.626	10.4193	0.279228	0.953354
	Cx (x>3)	106.605	7.46215	0.548745	0.953354
	C0/C2	102.407	6.02367	0.757084	0.757084
	Ceven/C2	89.2512	6.01837	0.301769	0.757084
	Codd/C3	94.8948	5.16652	0.464051	0.757084
	C0/(C2+C3)	102.976	5.97314	0.70642	0.757084
	CX short (C4-C14)	102.819	9.69349	0.838532	0.95904
	CX medium (C16-C18)	114.211	8.32694	0.314283	0.953354
	CX-OH	104.551	4.83076	0.75989	0.953354
	CX non OH	107.812	7.85842	0.511062	0.953354
	CX-OH/non OH	97.9426	10.7392	0.91017	0.97294
	CX DC	101.467	6.97294	0.892256	0.970524
	CX DC / non DC	93.6141	5.99637	0.510484	0.953354
	CX SFA	112.73	8.4909	0.381786	0.953354
	CX:1	100.34	11.5693	0.983138	0.983138
	CX:2	106.206	9.69351	0.595866	0.953354
	C4X	111.703	9.59533	0.364718	0.953354
	C5X	112.122	5.16819	0.102058	0.953354
	C6X	109.005	10.3665	0.543988	0.953354
	C8X	109.642	15.9844	0.71673	0.953354
	C10X	98.9946	14.935	0.962551	0.97833
	C12X	96.7377	13.3835	0.860009	0.95904
	C14X	103.216	6.77275	0.743544	0.953354
	C16X	114.093	8.87428	0.372581	0.953354
	C18X	114.416	8.47152	0.248936	0.953354
	CX short (C4-C14)/C0	86.7062	14.773	0.474727	0.953354
	CX medium (C16-C18)/C0	96.2578	6.99842	0.680334	0.953354
	CX-OH/C0	91.0643	17.7041	0.725864	0.953354
	CX non OH/C0	90.9132	10.9391	0.512353	0.953354
	CX-OH/non OH/C0	87.4639	23.6233	0.682896	0.953354
	CX DC/C0	86.3702	17.0847	0.51594	0.953354
	CX DC / non DC / C0	82.6487	22.732	0.497845	0.953354
	CX SFA/C0	95.7349	6.75758	0.595748	0.953354
	CX:1/C0	84.4134	18.4177	0.499358	0.953354
	CX:2/C0	85.9659	9.61569	0.28358	0.953354
	C4X/C0	91.8415	12.2124	0.60682	0.953354
	C5X/C0	95.3605	13.0876	0.766611	0.953354
	C6X/C0	89.309	10.8309	0.503191	0.953354
	C7X/C0	77.6945	20.9516	0.430877	0.953354
	C8X/C0	94.5925	12.2693	0.718744	0.953354
	C9X/C0	81.075	11.3724	0.212736	0.953354
	C10X/C0	83.5079	21.7871	0.550967	0.953354
	C12X/C0	82.2338	21.002	0.481887	0.953354
	C14X/C0	86.9572	9.14006	0.23553	0.953354
	C16X/C0	97.4919	7.58178	0.794569	0.95904
	C18X/C0	94.2032	6.92418	0.564509	0.953354
	CX short (C4-C14)/Ctot	96.433	4.78942	0.602824	0.953354
	CX medium (C16-C18)/Ctot	107	8.47127	0.602824	0.953354
	CX-OH/Ctot	98.8167	10.3158	0.947187	0.97833
	CX non OH/Ctot	101.256	0.511838	0.286454	0.953354
	CX-OH/non OH/Ctot	92.5808	17.4759	0.768834	0.953354
	CX DC/Ctot	95.0415	5.79961	0.587151	0.953354
	CX SFA/Ctot	105.948	6.92397	0.591613	0.953354
	CX:1/Ctot	93.8688	8.74808	0.61355	0.953354
	CX:2/Ctot	99.3774	10.697	0.961362	0.97833
	C4X/Ctot	102.05	6.04291	0.857244	0.95904
	C5X/Ctot	103.799	4.29288	0.673539	0.953354
	C6X/Ctot	101.236	5.08033	0.86623	0.95904
	C7X/Ctot	88.9017	13.8379	0.579131	0.953354
	C8X/Ctot	104.799	14.483	0.822401	0.95904
	C9X/Ctot	89.9042	9.85698	0.491268	0.953354
	C10X/Ctot	92.9848	13.1789	0.708972	0.953354
	C12X/Ctot	90.7811	11.5998	0.551325	0.953354
	C14X/Ctot	97.3882	5.37667	0.683782	0.953354
	C16X/Ctot	107.547	9.58852	0.621537	0.953354
	C18X/Ctot	106.068	7.39393	0.597882	0.953354
TAG processed and normalized to total	TAG total	140.757	24.9766	0.305075	0.84681
	C48:0/tot	84.6787	8.92726	0.157731	0.709791
	C50:0/tot	79.7896	8.31626	0.0990323	0.594194
	C50:1/tot	100.352	7.36123	0.968653	0.989921
	C50:2/tot	99.8232	6.58465	0.989921	0.989921
	C50:3/tot	149.706	10.5573	0.0976726	0.594194
	C52:0/tot	56.8442	8.48998	0.0641633	0.594194
	C52:1/tot	92.5889	5.52911	0.445357	0.84681
	C52:2/tot	109.415	4.41259	0.24332	0.84681
	C52:3/tot	114.443	15.4535	0.455669	0.84681
	C52:4/tot	109.511	11.6958	0.635802	0.953703
	C52:5/tot	126.541	23.6497	0.511128	0.84681
	C54:2/tot	119.415	9.03497	0.332663	0.84681
	C54:3/tot	93.0229	15.832	0.713118	0.980876
	C54:4/tot	99.5756	12.2742	0.986125	0.989921
	C54:5/tot	94.4512	16.4823	0.817397	0.980876
	C54:6/tot	107.402	20.3747	0.808889	0.980876
	C54:7/tot	122.205	21.0424	0.517495	0.84681
	C0/PC total	117.618	13.0531	0.338871	0.854253
	C2/PC total	113.771	8.46036	0.247817	0.854253
	C(2+3)/PC total	116.67	12.4618	0.333555	0.854253
	Cx(X > 3)/PC total	102.056	7.91338	0.853155	0.854253
	C0/TAG total	96.0057	14.4462	0.825693	0.854253
	C2/TAG total	93.0113	12.4771	0.672256	0.854253
	C(2+3)/TAG total	94.9876	13.9988	0.776261	0.854253
	Cx(X > 3)/TAG total	84.113	14.5027	0.397851	0.854253
	Pcaa x:4/Lyso PC total	93.8233	5.3862	0.481627	0.854253
	Pcaa (x:4/x:5+x:6)/Lyso PC total	90.5429	10.6849	0.425328	0.854253
	Pcaa x:6/lyso PC total	96.657	6.4239	0.730676	0.854253
	Pcae x:4/Lyso PC total	91.4399	9.68387	0.461404	0.854253
	Pcae (x:4/x:5+x:6)/Lyso PC total	87.8822	10.938	0.293162	0.854253
	Pcae x:6/lyso PC total	92.9033	10.1614	0.57054	0.854253
	C5-DC-M / C5	97.0674	12.0788	0.836735	0.854253
	C5:1 DC / C5:1	107.791	9.77877	0.597466	0.854253
	C12 DC / C12	93.022	16.4174	0.854253	0.854253
	TAG SFA (X:0)	106.328	20.703	0.80433	0.80433
	TAG PUFA (X:>3)	168.298	30.2727	0.214717	0.402614
	TAG X:1	139.027	31.0587	0.417959	0.470204
	TAG X:2	141.613	23.3197	0.313144	0.402614
	TAG X:3	162.138	23.8739	0.14913	0.402614
	TAG X:4	173.409	32.629	0.22625	0.402614
	TAG X:5	129.884	13.2769	0.199517	0.402614
	TAG X:6	155.075	26.8849	0.2498	0.402614
	TAG X:7	197.093	42.7328	0.301807	0.402614
	TAG SFA (X:0) / total TAGs	76.5763	6.98136	0.0365806	0.329226
	TAG PUFA (X:>3) / total TAGs	108.218	8.28263	0.587634	0.855025
	TAG X:1 / total TAGs	97.2068	6.03615	0.734378	0.855025
	TAG X:2 / total TAGs	107.32	3.51263	0.344193	0.855025
	TAG X:3 / total TAGs	114.603	14.1474	0.409924	0.855025
	TAG X:4 / total TAGs	108.051	9.49431	0.62886	0.855025
	TAG X:5 / total TAGs	103.382	12.4375	0.855025	0.855025
	TAG X:6 / total TAGs	107.402	20.3747	0.808889	0.855025
	TAG X:7 / total TAGs	122.205	21.0424	0.517495	0.855025

## Sheet: C) Q1-Q3 masses
Table S3: Q1/Q3 masses, declustering potentials (DP), and collision energy (CE) for the analyzed metabolites.
Metabolit	Q1 mass (Da)	formula	Q3 mass (Da)	DP (volts)	CE (volts)
C0	162.1	C7H16NO3	85.1	61	27
C2	204.1	C9H18NO4	85.1	41	27		Exemplaric fragmentation pattern for carnitins using carnitin C18:1 as example:
C3	218.1	C10H20NO4	85.1	46	29
C03 OH	234.1	C10H20NO5	85.1	53	30
C3:1	216.1	C10H18NO4	85.1	49	27
C4	232.2	C11H22NO4	85.1	46	29
C4 OH	248.1	C11H22NO5	85.1	55	32
C4:1	230.1	C11H20NO4	85.1	52	29
C5	246.2	C12H24NO4	85.1	46	29
C5 M DC	290.2	C13H24NO6	85.1	63	37
C5 OH	262.2	C12H24NO5	85.1	58	33
C5:1	244.2	C12H22NO4	85.1	55	31
C5:1 DC	274.1	C12H20NO6	85.1	60	35
C6	260.2	C13H26NO4	85.1	56	27
C6 OH	276.2	C13H26NO5	85.1	61	35
C6:1	258.2	C13H24NO4	85.1	57	33
C7 DC	304.2	C14H26NO6	85.1	66	39
C8	288.2	C15H30NO4	85.1	66	33
C8:1	286.2	C15H28NO4	85.1	63	37
C9	302.2	C16H32NO4	85.1	66	39
C10	316.2	C17H34NO4	85.1	56	37
C10:1	314.2	C17H32NO4	85.1	68	40
C10:2	312.2	C17H30NO4	85.1	67	40
C12	344.3	C19H38NO4	85.1	73	44
C12 DC	374.3	C19H36NO6	85.1	86	45
C12:1	342.3	C19H36NO4	85.1	73	44
C14	372.3	C21H42NO4	85.1	86	45
C14:1	370.3	C21H40NO4	85.1	78	47
C14:1 OH	386.3	C21H40NO5	85.1	81	50
C14:2	368.3	C21H38NO4	85.1	78	47
C14:2 OH	384.3	C21H38NO5	85.1	81	49
C16	400.3	C23H46NO4	85.1	84	51
C16 OH	416.3	C23H46NO5	85.1	87	53
C16:1	398.3	C23H44NO4	85.1	84	51
C16:1 OH	414.3	C23H44NO5	85.1	87	53
C16:2	396.3	C23H42NO4	85.1	83	51
C16:2 OH	412.3	C23H42NO5	85.1	86	53
C18:0	428.4	C25H50NO4	85.1	96	63
C18:1	426.4	C25H48NO4	85.1	89	55
C18:1 OH	442.4	C25H48NO5	85.1	92	57
C18:2	424.3	C25H46NO4	85.1	89	54
Lyso PC 06:0	356.2	C14H31NO7P	184	72	31
Lyso PC 10:0	412.3	C18H39NO7P	184	76	30		Exemplaric fragmentation pattern for phosphatidylcholine species (PCaa, PCae, Lyso-PC) using PCaa 16:0/18:1 as example:
Lyso PC 12:0	440.4	C20H43NO7P	184	78	30
Lyso PC 14:0	468.3	C22H47NO7P	184	79	30
Lyso PC 16:0	496.3	C24H51NO7P	184	81	31
Lyso PC 16:1	494.3	C24H49NO7P	184	79	30
Lyso PC 17:0	510.3	C25H53NO7P	184	82	31
Lyso PC 18:0	524.3	C26H55NO7P	184	85	31
Lyso PC 18:1	522.3	C26H53NO7P	184	82	31
Lyso PC 18:2	520.3	C26H51NO7P	184	82	31
Lyso PC 18:3	518.4	C26H49NO7P	184	82	31
Lyso PC 20:0	552.4	C28H59NO7P	184	89	31
Lyso PC 20:3	546.3	C28H53NO7P	184	87	31
Lyso PC 20:4	544.3	C28H51NO7P	184	85	31
Lyso PC 20:5	542.4	C28H49NO7P	184	84	31
Lyso PC 22:0	580.5	C30H63NO7P	184	93	32
Lyso PC 22:6	568.4	C30H51NO7P	184	90	32
Lyso PC 24:0	608.4	C32H67NO7P	184	96	33
Lyso PC 26:0	636.5	C34H71NO7P	184	101	34
Lyso PC 26:1	634.4	C34H69NO7P	184	98	33
Lyso PC 28:0	664.5	C36H75NO7P	184	105	35
Lyso PC 28:1	662.5	C36H73NO7P	184	103	35
PC aa C20:0	566.2	C28H57NO8P	184	94	31
PC aa C24:0	622.4	C32H65NO8P	184	98	33
PC aa C26:0	650.5	C34H69NO8P	184	103	35
PC aa C28:0	678.5	C36H73NO8P	184	106	35
PC aa C28:1	676.5	C36H71NO8P	184	106	35
PC aa C30:0	706.5	C38H77NO8P	184	114	37
PC aa C30:2	702.5	C38H73NO8P	184	111	37
PC aa C32:0	734.6	C40H81NO8P	184	119	39
PC aa C32:1	732.6	C40H79NO8P	184	118	39
PC aa C32:2	730.5	C40H77NO8P	184	117	38
PC aa C32:3	728.5	C40H75NO8P	184	117	38
PC aa C34:1	760.6	C42H83NO8P	184	125	41
PC aa C34:2	758.6	C42H81NO8P	184	123	40
PC aa C34:3	756.6	C42H79NO8P	184	123	40
PC aa C34:4	754.5	C42H77NO8P	184	122	40
PC aa C36:0	790.6	C44H89NO8P	184	131	43
PC aa C36:1	788.6	C44H87NO8P	184	131	43
PC aa C36:2	786.6	C44H85NO8P	184	130	42
PC aa C36:3	784.6	C44H83NO8P	184	130	42
PC aa C36:4	782.6	C44H81NO8P	184	129	42
PC aa C36:5	780.6	C44H79NO8P	184	128	42
PC aa C36:6	778.5	C44H77NO8P	184	128	42
PC aa C38:0	818.7	C46H93NO8P	184	138	45
PC aa C38:1	816.7	C46H91NO8P	184	138	45
PC aa C38:3	812.6	C46H87NO8P	184	136	44
PC aa C38:4	810.6	C46H85NO8P	184	136	44
PC aa C38:5	808.6	C46H83NO8P	184	136	44
PC aa C38:6	806.6	C46H81NO8P	184	135	44
PC aa C40:0	846.7	C48H97NO8P	184	145	47
PC aa C40:1	844.7	C48H95NO8P	184	145	47
PC aa C40:2	842.7	C48H93NO8P	184	144	47
PC aa C40:3	840.7	C48H91NO8P	184	144	47
PC aa C40:4	838.6	C48H89NO8P	184	144	47
PC aa C40:5	836.6	C48H87NO8P	184	143	47
PC aa C40:6	834.6	C48H85NO8P	184	143	46
PC aa C42:0	874.7	C50H101NO8P	184	154	50
PC aa C42:1	872.7	C50H99NO8P	184	153	50
PC aa C42:2	870.7	C50H97NO8P	184	153	50
PC aa C42:4	866.7	C50H93NO8P	184	152	50
PC aa C42:5	864.7	C50H91NO8P	184	151	49
PC aa C42:6	862.6	C50H89NO8P	184	150	49
PC aa C44:0	902.7	C52H105NO8P	184	163	50
PC aa C48:0	958.8	C56H113NO8P	184	170	50
PC ae C30:0	692.6	C38H79NO7P	184	111	37
PC ae C30:1	690.5	C38H77NO7P	184	109	36
PC ae C30:2	688.5	C38H75NO7P	184	108	36
PC ae C32:1	718.6	C40H81NO7P	184	115	38
PC ae C32:2	716.6	C40H79NO7P	184	114	37
PC ae C34:0	748.6	C42H87NO7P	184	122	40
PC ae C34:1	746.6	C42H85NO7P	184	121	39
PC ae C34:2	744.6	C42H83NO7P	184	120	39
PC ae C34:3	742.6	C42H81NO7P	184	120	39
PC ae C36:0	776.7	C44H91NO7P	184	128	42
PC ae C36:1	774.6	C44H89NO7P	184	127	41
PC ae C36:2	772.6	C44H87NO7P	184	127	41
PC ae C36:3	770.6	C44H85NO7P	184	126	41
PC ae C36:4	768.6	C44H83NO7P	184	126	41
PC ae C36:5	766.6	C44H81NO7P	184	125	41
PC ae C38:0	804.7	C46H95NO7P	184	135	44
PC ae C38:1	802.7	C46H93NO7P	184	134	44
PC ae C38:2	800.7	C46H91NO7P	184	133	43
PC ae C38:3	798.6	C46H89NO7P	184	133	43
PC ae C38:4	796.6	C46H87NO7P	184	133	43
PC ae C38:5	794.6	C46H85NO7P	184	132	43
PC ae C38:6	792.6	C46H83NO7P	184	132	43
PC ae C40:0	832.7	C48H99NO7P	184	142	46
PC ae C40:1	830.7	C48H97NO7P	184	141	46
PC ae C40:2	828.7	C48H95NO7P	184	141	46
PC ae C40:3	826.7	C48H93NO7P	184	140	46
PC ae C40:4	824.7	C48H91NO7P	184	140	45
PC ae C40:5	822.6	C48H89NO7P	184	139	45
PC ae C40:6	820.6	C48H87NO7P	184	139	45
PC ae C42:0	860.8	C50H103NO7P	184	150	49
PC ae C42:1	858.7	C50H101NO7P	184	141	46
PC ae C42:2	856.7	C50H99NO7P	184	149	48
PC ae C42:3	854.7	C50H97NO7P	184	148	48
PC ae C42:4	852.7	C50H95NO7P	184	148	48
PC ae C42:5	850.7	C50H93NO7P	184	147	48
PC ae C44:3	882.7	C52H101NO7P	184	156	51
PC ae C44:4	880.7	C52H99NO7P	184	156	51
PC ae C44:5	878.7	C52H97NO7P	184	155	51
PC ae C44:6	876.7	C52H95NO7P	184	154	50
SM 18:1/14:1 OH	689.6	C37H73N2O7P	184	108	36
SM 18:1/16:0	703.6	C39H80N2O6P	184	112	37		Exemplaric fragmentation pattern for sphingomyelines using SM (d18:1/16:0) as example:
SM 18:1/16:1	701.6	C39H78N2O6P	184	111	37
SM 18:1/16:1 OH	717.6	C39H77N2O7P	184	114	38
SM 18:1/18:0	731.6	C41H84N2O6P	184	117	38
SM 18:1/18:1	729.6	C41H82N2O6P	184	117	38
SM 18:1/20:2	755.6	C43H83N2O6P	184	123	40
SM 18:1/22:1 OH	801.7	C45H89N2O7P	184	134	43
SM 18:1/22:2 OH	799.7	C45H87N2O7P	184	133	43
SM 18:1/22:3	781.6	C45H84N2O6P	184	129	42
SM 18:1/24:0	815.7	C47H96N2O6P	184	137	45
SM 18:1/24:1	813.7	C47H94N2O6P	184	137	45
SM 18:1/24:1 OH	829.7	C47H94N2O7P	184	141	46
SM 18:1/26:0	843.7	C49H100N2O6P	184	145	47
SM 18:1/26:1	841.7	C49H98N2O6P	184	144	47
TAG C48:0	824.8	C51H102NO6	551.8	100	25
TAG C50:3	846.8	C53H100NO6	573.8	100	25		Exemplaric fragmentation pattern for triacylglycerides using TAG 18:2/18:2/18:3 as example:
TAG C50:2	848.8	C53H102NO6	575.8	100	25
TAG C50:1	850.8	C53H104NO6	577.8	100	25
TAG C50:0	852.8	C53H106NO6	579.8	100	25
TAG C52:5	870.8	C55H100NO6	597.8	100	25
TAG C52:4	872.8	C55H102NO6	599.8	100	25
TAG C52:3	874.8	C55H104NO6	601.8	100	25
TAG C52:2	876.8	C55H106NO6	603.8	100	25
TAG C52:1	878.8	C55H108NO6	605.8	100	25
TAG C52:0	880.8	C55H110NO6	607.8	100	25
TAG C54:7	894.8	C57H100NO6	599.8	100	25
TAG C54:6	896.8	C57H102NO6	601.8	100	25
TAG C54:5	898.8	C57H104NO6	625.8	100	25
TAG C54:4	900.8	C57H106NO6	627.8	100	25
TAG C54:3	902.8	C57H108NO6	629.8	100	25
TAG C54:2	904.8	C57H110NO6	631.8	100	25
